# Supplementary material for: Association between subjective risk perception and objective risk estimation in patients with atrial fibrillation: a cross-sectional study
Source: PubMed Central journal article supplement — BMJ Open. 2017 Sep 25;7(9):e018242. doi: 10.1136/bmjopen-2017-018242 (PMC5623506; doi:10.1136/bmjopen-2017-018242), 2017-09-25
Supplement: bmjopen-2017-018242.draft_revisions.pdf [file bmjopen-2017-018242.draft_revisions.pdf]

# BMJ Open

BMJ Open is committed to open peer review. As part of this commitment we make the peer review history of every article we publish publicly available.

When an article is published we post the peer reviewers' comments and the authors' responses online. We also post the versions of the paper that were used during peer review. These are the versions that the peer review comments apply to.

The versions of the paper that follow are the versions that were submitted during the peer review process. They are not the versions of record or the final published versions. They should not be cited or distributed as the published version of this manuscript.

BMJ Open is an open access journal and the full, final, typeset and author-corrected version of record of the manuscript is available on our site with no access controls, subscription charges or pay-per-view fees (<http://bmjopen.bmj.com>).

If you have any questions on BMJ Open's open peer review process please email [editorial.bmjopen@bmj.com](mailto:editorial.bmjopen@bmj.com)

# BMJ Open

## Mind the gap - atrial fibrillation patients and their physicians perceive risk and benefits of stroke prevention differently

|                                 |                                                                                                                                                                                                                                                                                                                                                                                                                                                                                                                                                                                                                                                                                                                                                                                                                                                                                                                                                                                                                                                         |
|---------------------------------|---------------------------------------------------------------------------------------------------------------------------------------------------------------------------------------------------------------------------------------------------------------------------------------------------------------------------------------------------------------------------------------------------------------------------------------------------------------------------------------------------------------------------------------------------------------------------------------------------------------------------------------------------------------------------------------------------------------------------------------------------------------------------------------------------------------------------------------------------------------------------------------------------------------------------------------------------------------------------------------------------------------------------------------------------------|
| Journal:                        | <i>BMJ Open</i>                                                                                                                                                                                                                                                                                                                                                                                                                                                                                                                                                                                                                                                                                                                                                                                                                                                                                                                                                                                                                                         |
| Manuscript ID                   | bmjopen-2017-018242                                                                                                                                                                                                                                                                                                                                                                                                                                                                                                                                                                                                                                                                                                                                                                                                                                                                                                                                                                                                                                     |
| Article Type:                   | Research                                                                                                                                                                                                                                                                                                                                                                                                                                                                                                                                                                                                                                                                                                                                                                                                                                                                                                                                                                                                                                                |
| Date Submitted by the Author:   | 16-Jun-2017                                                                                                                                                                                                                                                                                                                                                                                                                                                                                                                                                                                                                                                                                                                                                                                                                                                                                                                                                                                                                                             |
| Complete List of Authors:       | Zweiker, David; Medizinische Universitat Graz, Division of Cardiology, Department of Internal Medicine<br>Zweiker, Robert; Medizinische Universitat Graz, Division of Cardiology, Department of Internal Medicine<br>Roesch, Konstantina; Medizinische Universitat Graz, Division of Cardiology, Department of Internal Medicine<br>Schumacher, Martin; Krankenhaus Barmherzige Bruder Graz, Department of Internal Medicine<br>Stepan, Vinzenz; Krankenhaus der Elisabethinen, Department of Internal Medicine<br>Krippel, Peter; Landeskrankenhaus Furstenfeld, Department of Internal Medicine<br>Bauer, Norbert; Landeskrankenhaus Hartberg, Department of Internal Medicine<br>Heine, Martin; Landeskrankenhaus Feldbach, Department of Neurology<br>Reicht, Gerhard; Krankenhaus Barmherzige Bruder Graz-Eggenberg<br>Zweiker, Gudrun; General Practitioner<br>Sprenger, Martin; Medizinische Universitat Graz, Department of Social Medicine and Epidemiology<br>Watzinger, Norbert; Landeskrankenhaus Feldbach, Department of Internal Medicine |
| <b>Primary Subject Heading</b>: | Cardiovascular medicine                                                                                                                                                                                                                                                                                                                                                                                                                                                                                                                                                                                                                                                                                                                                                                                                                                                                                                                                                                                                                                 |
| Secondary Subject Heading:      | Cardiovascular medicine                                                                                                                                                                                                                                                                                                                                                                                                                                                                                                                                                                                                                                                                                                                                                                                                                                                                                                                                                                                                                                 |
| Keywords:                       | Anticoagulation < HAEMATOLOGY, CARDIOLOGY, Cardiology < INTERNAL MEDICINE                                                                                                                                                                                                                                                                                                                                                                                                                                                                                                                                                                                                                                                                                                                                                                                                                                                                                                                                                                               |
|                                 |                                                                                                                                                                                                                                                                                                                                                                                                                                                                                                                                                                                                                                                                                                                                                                                                                                                                                                                                                                                                                                                         |

SCHOLARONE™  
Manuscripts

1  
2  
3  
4 **Mind the gap - atrial fibrillation patients and their**  
5  
6  
7 **physicians perceive risk and benefits of stroke prevention**  
8  
9  
10 **differently**  
11  
12

13 David Zweiker<sup>1</sup>, Robert Zweiker<sup>1</sup>, Konstantina Roesch<sup>1</sup>, Martin Schumacher<sup>2</sup>,  
14 Vinzenz Stepan<sup>3</sup>, Peter Krippel<sup>4</sup>, Norbert Bauer<sup>5</sup>, Martin Heine<sup>6</sup>, Gerhard Reicht<sup>7</sup>,  
15 Gudrun Zweiker<sup>8</sup>, Martin Sprenger<sup>9</sup>, Norbert Watzinger<sup>10\*</sup>  
16  
17  
18  
19  
20

21 <sup>1</sup> Division of Cardiology, Department of Internal Medicine, Medical University of Graz,  
22 Graz, Austria  
23

24 <sup>2</sup> Department of Internal Medicine, Hospital Barmherzige Brueder Marschallgasse,  
25 Graz, Austria  
26  
27

28 <sup>3</sup> Department of Internal Medicine, Hospital Elisabethinen, Graz, Austria  
29

30 <sup>4</sup> Department of Internal Medicine, LKH Fürstenfeld, Krankenhausverbund Feldbach-  
31 Fürstenfeld, Fürstenfeld, Austria  
32  
33

34 <sup>5</sup> Department of Internal Medicine, LKH Hartberg, Hartberg, Austria  
35  
36

37 <sup>6</sup> Department of Neurology, LKH Feldbach, Krankenhausverbund Feldbach-  
38 Fürstenfeld, Feldbach, Austria  
39  
40  
41

42 <sup>7</sup> Department of Internal Medicine, Hospital Barmherzige Brueder Eggenberg, Graz,  
43 Austria  
44  
45

46 <sup>8</sup> General Practitioner, Straden, Austria  
47

48 <sup>9</sup> Department of Social Medicine and Epidemiology, Medical University of Graz, Graz,  
49 Austria  
50  
51

52 <sup>10</sup> Department of Internal Medicine, LKH Feldbach, Krankenhausverbund Feldbach-  
53 Fürstenfeld, Feldbach, Austria  
54  
55  
56  
57  
58  
59  
60

1  
2  
3 \* Corresponding author:

4 Norbert Watzinger, MD

5 Department of Internal Medicine, LKH Feldbach

6  
7 Krankenhausverbund Feldbach-Fürstenfeld

8  
9 Ottokar-Kernstock-Strasse 18

10  
11 8330 Feldbach

12  
13 Austria

14  
15 email: [norbert.watzinger@lkh-feldbach.at](mailto:norbert.watzinger@lkh-feldbach.at)

16  
17 phone: +43 3152 899 3201

18  
19 fax: +43 3152 899 3209

## Abstract

### Objective

Since more than 20 years, oral anticoagulation (OAC) is state-of-the-art therapy for atrial fibrillation (AF), the most common arrhythmia worldwide. However, little is known about the perception of AF patients and how it correlates with risk scores used by their physicians. Therefore, the objective of our study was to correlate patients' estimates of their own stroke and bleeding risk with the objectively predicted individual risk using CHA<sub>2</sub>DS<sub>2</sub>-VASc and HAS-BLED scores.

### Design

Cross-sectional prevalence study using convenience sampling.

### Settings

Nine hospitals (first, secondary and tertiary care) and one general practitioner in Austria. Patients' perception of stroke and bleeding risk was opposed to commonly used risk scoring.

### Participants

Patients with newly diagnosed AF and indication for anticoagulation.

### Main Outcome Measures

Comparison of subjective risk perception with CHA<sub>2</sub>DS<sub>2</sub>-VASc and HAS-BLED scores showing possible discrepancies between subjective and objective risk estimation. Patients' judgement of their own knowledge on AF and education were also correlated with accuracy of subjective risk appraisal.

## Results

Ninety-one patients (age  $73 \pm 11$  years, 45% female) were included in this study. Subjective stroke and bleeding risk estimation did not correlate with risk scores ( $\rho=0.08$ ,  $\rho=0.47$  and  $\rho=0.17$ ,  $\rho=0.15$ ). The majority of patients (57%) underestimated the individual bleeding risk. Patients feared stroke more than bleeding (67% vs. 10%). There was no relationship between accurate perception of stroke and bleeding risks and education level ( $\rho=-0.06$ ,  $\rho=0.63$  and  $\rho=0.17$ ,  $\rho=0.15$ ). However, we found a correlation between the patients' judgement of their own knowledge of AF and correct assessment of individual stroke risk ( $\rho=0.24$ ,  $\rho=0.02$ ).

## Conclusions

In this cross-sectional analysis of OAC-naïve AF patients, we found major differences between patients' perceptions and physicians' assessments of risks and benefits of OAC. To ensure shared decision-making and informed consent, more attention should be given to evidence-based and useful communication strategies.

## Trial registration

NCT03061123

## Key words

Atrial fibrillation, oral anticoagulation, questionnaire, self-assessment

## Article summary

### Strengths and limitations

- The design of this cross-sectional study allowed the objective assessment of the patients' risk perception immediately after initiation of anticoagulation for atrial fibrillation.
- For generalizability, primary, secondary and tertiary health care centres were included in this study.
- The low sample size is the main limitation of this study.

## Introduction

Atrial fibrillation (AF) is the most common significant arrhythmia worldwide, associated with a fivefold increase in risk for stroke<sup>1</sup> and almost doubles of mortality.<sup>2</sup> In an ageing population, the number of individuals affected is projected to increase exponentially over the next decades.<sup>3</sup> Since the early 1990ies, oral anticoagulation (OAC) is the state-of-the-art therapy for reducing stroke and embolic events.<sup>2</sup> OAC is considered a long-term, often lifelong medical intervention. Therefore, clinicians and particularly patients need to have a clear understanding of the related benefits and immanent harms.<sup>4</sup> It serves as reasonable background for shared-decision making of patients and their doctors, one of the most important principles for patients' reliance, compliance and adherence to recommended medical strategies.<sup>5 6</sup>

Adequate information of patients<sup>7</sup> and increased health literacy<sup>8 9</sup> are of major importance for compliance and adherence to therapy. Patients' knowledge also affects the perception of risk for stroke, embolic events and bleeding. It has been shown that the extent of information perceived influenced patients' preferences towards or against OAC treatment the most.<sup>10</sup>

Clinicians use algorithms like CHA<sub>2</sub>DS<sub>2</sub>-VASc and HAS-BLED scores<sup>11-13</sup> to predict the balance of future risk for stroke and embolic events versus bleeding in an individual patient. A recent survey of the European Heart Rhythm Association proved that a considerable amount of time and resources are needed in daily clinical practice to communicate risk / benefit ratios to patients suffering from AF: Several centres have established special OAC clinics and initial visits mostly lasted 21-30 minutes.<sup>14</sup> However, decades after the introduction of OAC therapy, standardised and validated risk communication tools<sup>15-17</sup> are still missing and adherence follow-up programmes



1  
2  
3 are rare.<sup>14</sup> Those programmes have an important impact on effectiveness of OAC:  
4  
5 Adherence to OAC is considered a key factor for preventing events,<sup>18</sup> but it is still as  
6  
7 low as 43%.<sup>19</sup>  
8  
9

10 Little is known about the perception of AF patients and how it correlates with risk  
11  
12 scores used by their physicians.<sup>20</sup> A potential gap between subjective and objective  
13  
14 assessments may increase the likelihood of non-compliance to OAC in AF patients.<sup>21</sup>  
15  
16 Therefore, the study was designed to correlate the subjective stroke and bleeding  
17  
18 risk with the objectively predicted individual risks calculated by CHA<sub>2</sub>DS<sub>2</sub>-VASc and  
19  
20 HAS-BLED scores.  
21  
22  
23  
24  
25  
26  
27  
28  
29  
30  
31  
32  
33  
34  
35  
36  
37  
38  
39  
40  
41  
42  
43  
44  
45  
46  
47  
48  
49  
50  
51  
52  
53  
54  
55  
56  
57  
58  
59  
60

## Methods

This work is a cross-sectional prevalence study, using convenience sampling by trained doctors at 10 centres (representing primary, secondary and tertiary health care) in the province of Styria, Austria. Responsible institutional review boards approved the study (1376/2015 [BHB Graz, Austria], 28-004 ex 15/16 [Medical University of Graz, Austria]) Furthermore, the study was registered under the ClinicalTrials.gov number NCT03061123. Patients with first diagnosed and ECG-documented non-valvular AF and indication for OAC were included in the study. Exclusion criteria were pre-existing OAC therapy, valvular heart disease, history of valve surgery, denial or inability of informed consent.

This study was designed to comply with standard operating procedures of individual centres for initiation of OAC therapy. Responsible physicians carried out pre-treatment interviews, including discussion of benefits, harms and side effects of OAC. After informed consent was signed, a standardized questionnaire was handed out to all patients (supplemental figure S1).

### **Questionnaire**

The survey was conducted using a standardized questionnaire with two parts (supplemental table S1). The patient-oriented part consisted of seven questions covering subjective perception of patients with regard to general individual risk/benefit ratios of OAC in AF, the willingness of therapy continuation even in the possible case of minor adverse effects (haematoma, minor bleeding) and the individually discerned level of information. We used 3- and 4-point verbal rating scales to comply with the patients' categorical perception of checks and balances.<sup>22</sup>

1  
2  
3 Physicians in charge of patients filled the second part, which included patient  
4 demographics, CHA<sub>2</sub>DS<sub>2</sub>-VASc and HAS-BLED scores, as well as the intended OAC  
5 therapy.  
6  
7

8  
9  
10 CHA<sub>2</sub>DS<sub>2</sub>-VASc and HAS-BLED scores were stratified into four risk categories each  
11 corresponding to the four different risk levels for stroke/embolic events and bleeding  
12 interrogated by the patient questionnaire. Risk estimations were based on published  
13 data from large population studies. Regarding CHA<sub>2</sub>DS<sub>2</sub>-VASc score, patients with  
14 zero points (stroke rate 0-1%/year) were considered *low risk*, one point (stroke rate 1-  
15 2%/year) *intermediate risk*, 2-4 points (stroke rate 2-7%) *high risk* and  $\geq 5$  points  
16 (stroke rate  $> 7\%$ /year) *very high risk* cohort.<sup>11 23 24</sup> The corresponding categories  
17 concerning HAS-BLED score were as follows: no or one risk factor (*low risk* group,  
18 bleeding rate 0-4%/year), two risk factors (*intermediate risk* group, bleeding rate 4-  
19 6%/year), 3 or 4 risk factors (*high risk* group, bleeding rate 6-10%/year) and 5 or  
20 more risk factors (*very high risk* group, bleeding rate  $> 10\%$ /year).<sup>12 23</sup>  
21  
22  
23  
24  
25  
26  
27  
28  
29  
30  
31  
32  
33  
34  
35

36 For assessing the awareness of general benefit of OAC, we asked patients to  
37 estimate their appraisal of relative risk reduction (RRR) for stroke and embolic  
38 events. We defined *high* (RRR 50-74%) as accurate answer,<sup>25</sup> others were *low* (RRR  
39 0-24%), *intermediate* (RRR 25-49%) and *very high* (RRR 75-100%). We extrapolated  
40 predicted hazard ratios (HR) of bleeding due to OAC from meta-analyses<sup>25-28</sup> and  
41 defined the general risk of OAC as *intermediate* (HR 1.25-1.49). Other options were  
42 *low* (HR 1.00-1.24), *high* (HR 1.50-2.00) and *very high* (HR  $> 2.00$ ). Subjective scales  
43 were interpreted as "correct" if they corresponded correctly to individual objective risk  
44 groups.  
45  
46  
47  
48  
49  
50  
51  
52  
53  
54  
55  
56  
57  
58  
59  
60

## **Statistical analysis**

### **Sample size calculation**

Sample size calculation was performed using the freeware tool G\*Power by Heinrich Heine University Düsseldorf (<http://www.gpower.hhu.de>). We sought to oppose the self-reported benefits and risks of OAC with an actual assessment using validated data (including CHA<sub>2</sub>DS<sub>2</sub>-VASc Score and HAS-BLED Score). To prove correlation ( $|\rho| < 0.3$ ) with type I error ( $\alpha$ ) of 0.05 and power ( $1 - \beta$ ) of 80%, at least 84 patients had to be included into the study.

### **Univariate analysis**

Two-sided significance level was 0.05. Data are presented as mean  $\pm$  standard deviation, median (interquartile range) or count (proportion), where appropriate. Pearson's test and Spearman's rank correlation coefficient were used to correlate ordinal variables (e.g. subjective perceptions and risk scores). Correlation coefficients (i.e.  $|r|$ ,  $|\rho|$ ) were interpreted as follows: negligible correlation (0.0-0.3), low correlation (0.3-0.5), moderate correlation (0.5-0.8) and strong correlation (0.8-1.0).<sup>29</sup>

Data were analysed with IBM® SPSS® Statistics version 23 (IBM Corporation, Armonk, NY).

## Results

### ***Patient population***

From September 2015 to March 2016, 91 patients (age  $73 \pm 11$  years, 45% female) from nine centres were included in this study (supplemental table S3). As highest educational attainment, lower secondary education (ISCED level 2,  $n=32$ , 35%) and higher secondary vocational education (ISCED level 3B  $n=25$ , 28%) were most prevalent. New oral anticoagulants (NOACs) were used most frequently ( $n=75$ , 82%). vitamin K antagonists ( $n=14$ , 15%) and low-molecular weight heparin ( $n=2$ , 2%) were given to remaining patients.

### ***Objective risk estimation***

Median CHA<sub>2</sub>DS<sub>2</sub>-VASc-Score was 4 (interquartile range 2-5). Therefore, we summarized most patients on high risk for stroke or embolic event (CHA<sub>2</sub>DS<sub>2</sub>-VASc score 2-4, stroke risk 2-7%/year, figure 1). Most common risk factors were arterial hypertension and age > 75 years (table 1). In terms of HAS-BLED score, most of patients were in low (0-1 points, bleeding risk 0–4 %) and intermediate risk groups (2 points, bleeding risk 4–6 %; figure 1).

### ***Perception of individual risk***

Many patients ( $n=41$ , 45%) interpreted risk for stroke and embolic events in atrial fibrillation *in general* as *high to very high* (corresponding stroke risk 2-7% and >7% per year, respectively). Bleeding risk was estimated mainly as *intermediate* (corresponding bleeding risk 4-6% per year,  $n=40$ , 44%). Patients feared stroke more than bleeding (67% vs. 10%) and only 9% would discontinue OAC therapy if minor

1  
2  
3 bleeding complications (e.g. epistaxis) would occur. Patients estimated their personal  
4  
5 level of information as *good* or *adequate* in 41% and 34%, respectively.  
6  
7

## 8 **Correlations**

9  
10  
11 Patients estimated their risk for stroke or embolic events in concordance to the  
12  
13 individual CHA<sub>2</sub>DS<sub>2</sub>-VASc score in 25 (28%) of cases, by the majority (n=52, 57%)  
14  
15 risk was underrated. Bleeding risk was assumed accurately in 37% (n=41), but  
16  
17 overestimated in 31 cases (34%). There were no significant correlations neither  
18  
19 between objectively assessed and subjectively expected risk for stroke nor for  
20  
21 bleeding ( $p=0.08$ ,  $p=0.47$ , figure 2 and  $p<0.01$ ,  $p=0.98$ , figure 3).  
22  
23  
24  
25

26 Analogies in patients' answers and CHA<sub>2</sub>DS<sub>2</sub>-VASc and HAS-BLED scores did not  
27  
28 correlate to the levels of highest education ( $p=-0.06$ ,  $p=0.64$  and  $p=0.17$ ,  $p=0.15$ ).  
29  
30 However, we observed a significant correlation between patients' judgement of their  
31  
32 knowledge of AF with regard to concordant assumptions of stroke risk and CHA<sub>2</sub>DS<sub>2</sub>-  
33  
34 VASc score ( $p=0.24$ ,  $p=0.02$ , figure 4). No correlation was observed between  
35  
36 patients' judgement of AF knowledge and concordance with subjectively assumed  
37  
38 and objectively predicted risk for bleeding events ( $p=0.08$ ,  $p=0.45$ ).  
39  
40  
41  
42

## 43 **Perception of general risk**

44  
45  
46 Most patients (n=51, 56%) assumed score-predicted effectiveness of OAC in AF as  
47  
48 *high* (corresponding stroke risk reduction 50-74%). Other answers were *very high*  
49  
50 (RRR 75-100%; n=23, 25%), *intermediate* (RRR 25-49%; n=15, 17%) or *low* (RRR 0-  
51  
52 24%; n=1, 1%). The estimated general risk of bleeding caused by OAC was  
53  
54 considered by patients as *intermediate* (HR for bleeding 1.25-1.49; n=37, 41%) and  
55  
56  
57  
58  
59  
60

1  
2  
3  
4  
5  
6  
7  
8  
9  
10  
11  
12  
13  
14  
15  
16  
17  
18  
19  
20  
21  
22  
23  
24  
25  
26  
27  
28  
29  
30  
31  
32  
33  
34  
35  
36  
37  
38  
39  
40  
41  
42  
43  
44  
45  
46  
47  
48  
49  
50  
51  
52  
53  
54  
55  
56  
57  
58  
59  
60

*low* (HR 1.00-1.24; n=30, 33%). Only 3 patients (3%) estimated the bleeding risk associated with OAC as *very high* (HR > 2.00).

For peer review only

## Discussion

This cross-sectional questionnaire study in 91 OAC-naïve patients with non-valvular AF shows that (1) patients generally underestimated their risk of stroke, (2) they perceived their individual stroke risk to higher extent than bleeding risk and (3) there was a significant correlation between accuracy in answers and patients' judgement of their knowledge of AF.

Due to the high prevalence of AF in the western world, non-adherence to OAC in AF patients has a tremendous impact on our society. Despite the availability of adequate therapy, AF-related strokes are still estimated to cost eight billion USD annually in the United States<sup>30 31</sup> or over 9,000 pounds per stroke in the UK.<sup>32</sup> The increased severity of AF-related strokes compared to other etiologies<sup>33</sup> may even increase the negative effect of general embolic events on quality of life.<sup>34</sup> As a consequence, it is urgently necessary to ameliorate adherence to OAC therapy for AF. We proved underjudgement of stroke risk and therefore postulate better patient education as possibility to overcome this problem.

### ***No correlation between subjective assessment and objective risk***

To our knowledge, this is the first study that compares the subjective risk perception of AF patients with evidence-based risk scores used in daily clinical practice. We found no significant correlation between subjective and objective assessment of stroke or bleeding risk. Therefore, our study provides evidence that a perception gap remains after informed consent discussion before OAC initiation.

If this finding remains constant in larger trials, it has a direct impact on clinical practice. Such a perception gap is problematic at the start of a lifelong medical



1  
2  
3 intervention. It hinders not only shared decision making, but it also influences  
4  
5 treatment compliance and adherence.  
6  
7

8  
9 Previous studies already evaluated the levels of information in patients after initiation  
10 of OAC treatment.<sup>20 35-39</sup> In a survey of 711 AF patients that were on OAC for at least  
11 one year, only 7% knew the purpose of anticoagulation in AF.<sup>38</sup> Lane et al.<sup>35</sup>  
12 observed that 51% of AF patients with OAC therapy for  $\geq 3$  months could not name  
13 their cardiac condition. Furthermore, the knowledge could not be increased by a brief  
14 educational intervention. McCabe et al.<sup>40</sup> showed considerable knowledge deficits  
15 already two weeks after initial diagnosis of AF. A recent qualitative systematic review  
16 postulated the lack of patient information as one of the most important reasons for  
17 VKA underuse.<sup>41</sup>  
18  
19

20  
21 Although Dantas et al.<sup>37</sup> demonstrated that only minimal knowledge of patients is  
22 needed to allow acceptance of OAC, doctors should seek shared decisions. This is  
23 even more important, when evidence for drug treatment is marginal,<sup>42</sup> which is  
24 definitely not the case in patients with high risk scores for AF.<sup>2</sup> However, the  
25 physician's perspective of shared decision making may not be congruent to the  
26 patient's perceptions.<sup>43</sup> LaHaye et al.<sup>44</sup> demonstrated high interpatient variability  
27 regarding individual treatment thresholds. Consequently, we propose that health  
28 literacy of patients should be enhanced before OAC initiation, especially regarding  
29 the individual risk/benefit ratio. Thus, patients may be able to participate in decision-  
30 making of therapy initiation. Patients also seem to have difficulties regarding verbal  
31 descriptions of risk.<sup>45</sup> Therefore, graphical information might help overcome this  
32 problem.<sup>7 15</sup> One promising example is an electronic prototype for the translation of  
33 Grading of Recommendations Assessment, Development and Evaluation (GRADE)  
34 summaries<sup>46</sup> into decision aids using interactive formats to present evidence  
35  
36  
37  
38  
39  
40  
41  
42  
43  
44  
45  
46  
47  
48  
49  
50  
51  
52  
53  
54  
55  
56  
57  
58  
59  
60

1  
2  
3 summaries at varying levels of detail.<sup>17</sup> Another possibility is the establishment of a  
4 Fact Box, which describes evidence of benefits and harms without making  
5 recommendations.<sup>16</sup> Further theory-driven educational interventions have been  
6  
7 shown to increase OAC control<sup>47</sup> or knowledge of INR targets.<sup>35</sup>  
8  
9  
10

### 11 12 ***Stroke is topping bleeding risk*** 13

14  
15  
16 In our study, most of the patients assumed their personal stroke risk to be the most  
17 frequent and serious complication of untreated atrial fibrillation in their setting.  
18  
19 However, the majority (57%) underestimated their stroke risk while 41% interpreted  
20 the bleeding risk accurately. In other studies, patients were keen on avoiding stroke  
21 more than bleeding<sup>48</sup> and placed even more importance on stroke prevention than  
22 doctors<sup>49</sup> with higher tolerance of adverse bleeding events.<sup>50</sup> With increased duration  
23 of OAC therapy, knowledge about OAC in the indication of AF seems to deteriorate.<sup>38</sup>  
24  
25  
26  
27  
28  
29  
30  
31

### 32 ***Factors influencing correct risk estimation*** 33

34  
35  
36 We found out that the highest level of educational attainment did not correlate with  
37 analogies in risk estimation in our analysis. Our results therefore indicate that  
38 understanding of individuals' risk is not correlated with formal education levels.  
39  
40 However, the preservation of knowledge might be correlated with better education.<sup>40</sup>  
41  
42 Lip et al.<sup>39</sup> showed differences of AF perceptions in different ethnical groups. We  
43 could not add evidence to this factor as we included only Caucasian patients.  
44  
45  
46  
47  
48  
49

50  
51 Patients that felt better informed had an improved understanding of their individual  
52 risks in this study. Consequently, we encourage to evaluate patients' information  
53 level repeatedly by asking how informed they felt and to take appropriate measures  
54  
55 to enhance the patient's level of information if required.  
56  
57  
58  
59  
60

## Limitations

Our study has several limitations. Firstly, patient enrolment was not consecutive and therefore selection bias cannot be ruled out. Secondly, our sample size was not large enough for comparing differences between sites. Therefore, we cannot assess how differences in risk communication may have influenced our study results. Thirdly, we currently have no follow up data available. Therefore, we can only assume that higher levels of information might be associated with better adherence and outcomes as results of previous studies suggested. Fourthly, recent ESC guidelines do not endorse the HAS-BLED score any more as additional non-modifiable risk factors of bleeding have been established in the recent years. The HAS-BLED score is still propagated by the National Institute for Health and Clinical Excellence (NICE) guidelines.<sup>51</sup> Lastly, we intended to concentrate on the risk perception of individual patients and did not evaluate the general knowledge of AF and stroke prevention per se in a standardized questionnaire.<sup>52</sup> Due to this fact, we kept the questionnaire short and tried to minimize bias due to selection of motivated patients that may not be representative of the general AF population.<sup>20</sup>

## Conclusion

In this cross-sectional analysis of OAC-naïve AF patients, we found major differences between patients' perceptions and physicians' assessments of risks and benefits of OAC. To ensure shared decision-making and informed consent, more attention should be given to evidence-based and useful communication strategies.

## Acknowledgements

We appreciate the helpful assistance of Mr. Stefan Zweiker in the preparation of the manuscript. This research received no specific grant from any funding agency in the public, commercial or not-for-profit sectors.

## Competing interests statement

Dr. Bauer reports personal fees from Bayer, Medtronic, Daiichi-Sankyo, Servier, personal fees from Bayer, AstraZeneca, other from Boehringer-Ingelheim, Bayer, Lilly, outside the submitted work.

Dr. Heine has nothing to disclose.

Dr. Krippel has nothing to disclose.

Dr. Reicht has nothing to disclose.

Dr. Schumacher has nothing to disclose.

Dr. Sprenger has nothing to disclose.

Dr. Stepan has nothing to disclose.

Dr. Watzinger reports personal fees from Lectures, personal fees from Consulting, outside the submitted work.

Dr. Zweiker D has nothing to disclose.

Dr. Zweiker G has nothing to disclose.

Dr. Zweiker R has nothing to disclose.

## Contributorship statement

RZ, MS and NW designed the study.

RZ, KR, MS, VS, PK, NB, MH, GR, GZ, MS and NW were involved in conduction of the study and data collection.

DZ and NW performed the statistical analysis.

DZ, RZ, MS and NW wrote the manuscript.

All authors have read and approved the last version of the manuscript.

## Data sharing statement

All raw data is available in the supplementary appendix.

## Tables

|                                                             |          |
|-------------------------------------------------------------|----------|
| <b>CHADS<sub>2</sub> score</b>                              | 2 (1-3)  |
| <b>CHA<sub>2</sub>DS<sub>2</sub>-VASc score</b>             | 4 (2-5)  |
| <b>Congestive heart failure</b>                             | 14 (15%) |
| <b>Hypertension</b>                                         | 75 (82%) |
| <b>Age &gt; 75 years</b>                                    | 48 (53%) |
| <b>Diabetes mellitus</b>                                    | 18 (20%) |
| <b>Stroke or TIA</b>                                        | 15 (17%) |
| <b>Vascular disease</b>                                     | 27 (30%) |
| <b>Age 65-75 years</b>                                      | 25 (28%) |
| <b>Female Sex</b>                                           | 41 (45%) |
| <b>HAS-BLED-Score</b>                                       | 2 (1-2)  |
| <b>Hypertension (systolic blood pressure &gt; 160 mmHg)</b> | 42 (46%) |
| <b>Abnormal kidney / liver function</b>                     | 8 (9%)   |
| <b>Stroke</b>                                               | 14 (15%) |
| <b>Bleeding</b>                                             | 1 (1%)   |
| <b>Labile INR values</b>                                    | 1 (1%)   |

1  
2  
3  
4  
5  
6  
7  
8  
9  
10  
11  
12  
13  
14  
15  
16  
17  
18  
19  
20  
21  
22  
23  
24  
25  
26  
27  
28  
29  
30  
31  
32  
33  
34  
35  
36  
37  
38  
39  
40  
41  
42  
43  
44  
45  
46  
47  
48  
49  
50  
51  
52  
53  
54  
55  
56  
57  
58  
59  
60

|                              |          |
|------------------------------|----------|
| Elderly (age > 65 years)     | 72 (79%) |
| Drugs or alcohol (1 point)   | 16 (18%) |
| Drugs and alcohol (2 points) | 2 (2%)   |

**Table 1.** CHA<sub>2</sub>DS<sub>2</sub>-VASc and HAS-BLED Scores and individual risk factors. TIA: transient ischaemic attack; INR: international normalized ratio.

For peer review only

## References

1. Camm AJ, Kirchhof P, Lip GY, et al. Guidelines for the management of atrial fibrillation: the Task Force for the Management of Atrial Fibrillation of the European Society of Cardiology (ESC). *Eur Heart J* 2010;31(19):2369-429. doi: 10.1093/eurheartj/ehq278
2. Kirchhof P, Benussi S, Kotecha D, et al. 2016 ESC Guidelines for the management of atrial fibrillation developed in collaboration with EACTS: The Task Force for the management of atrial fibrillation of the European Society of Cardiology (ESC) Developed with the special contribution of the European Heart Rhythm Association (EHRA) of the ESC Endorsed by the European Stroke Organisation (ESO). *Eur Heart J* 2016 doi: 10.1093/eurheartj/ehw210
3. Go AS, Hylek EM, Phillips KA, et al. Prevalence of diagnosed atrial fibrillation in adults: national implications for rhythm management and stroke prevention: the Anticoagulation and Risk Factors in Atrial Fibrillation (ATRIA) Study. *Jama* 2001;285(18):2370-5. [published Online First: 2001/05/10]
4. Coulter A, Ellins J. Effectiveness of strategies for informing, educating, and involving patients. *BMJ* 2007;335(7609):24-7. doi: 10.1136/bmj.39246.581169.80
5. Spatz ES, Krumholz HM, Moulton BW. The New Era of Informed Consent: Getting to a Reasonable-Patient Standard Through Shared Decision Making. *Jama* 2016;315(19):2063-4. doi: 10.1001/jama.2016.3070 [published Online First: 2016/04/22]
6. Deyo RA. A key medical decision maker: the patient. *BMJ* 2001;323(7311):466-7.
7. Lane DA, Barker RV, Lip GY. Best practice for atrial fibrillation patient education. *Curr Pharm Des* 2015;21(5):533-43.
8. Health literacy: report of the Council on Scientific Affairs. Ad Hoc Committee on Health Literacy for the Council on Scientific Affairs, American Medical Association. *Jama* 1999;281(6):552-7. [published Online First: 1999/02/18]
9. Berkman ND, Sheridan SL, Donahue KE, et al. Low health literacy and health outcomes: an updated systematic review. *Ann Intern Med* 2011;155(2):97-107. doi: 10.7326/0003-4819-155-2-201107190-00005
10. Wilke T, Bauer S, Mueller S, et al. Patient Preferences for Oral Anticoagulation Therapy in Atrial Fibrillation: A Systematic Literature Review. *Patient* 2016 doi: 10.1007/s40271-016-0185-9 [published Online First: 2016/07/28]
11. Lip GY, Nieuwlaat R, Pisters R, et al. Refining clinical risk stratification for predicting stroke and thromboembolism in atrial fibrillation using a novel risk factor-based approach: the euro heart survey on atrial fibrillation. *Chest* 2010;137(2):263-72. doi: 10.1378/chest.09-1584



- 1  
2  
3 12. Pisters R, Lane DA, Nieuwlaat R, et al. A novel user-friendly score (HAS-BLED)  
4 to assess 1-year risk of major bleeding in patients with atrial fibrillation: the  
5 Euro Heart Survey. *Chest* 2010;138(5):1093-100. doi: 10.1378/chest.10-0134  
6
- 7 13. January CT, Wann LS, Alpert JS, et al. 2014 AHA/ACC/HRS guideline for the  
8 management of patients with atrial fibrillation: a report of the American College  
9 of Cardiology/American Heart Association Task Force on Practice Guidelines  
10 and the Heart Rhythm Society. *J Am Coll Cardiol* 2014;64(21):e1-76. doi:  
11 10.1016/j.jacc.2014.03.022  
12
- 13 14. Potpara TS, Pison L, Larsen TB, et al. How are patients with atrial fibrillation  
14 approached and informed about their risk profile and available therapies in  
15 Europe? Results of the European Heart Rhythm Association Survey.  
16 *Europace* 2015;17(3):468-72. doi: 10.1093/europace/euv025 [published  
17 Online First: 2015/02/28]  
18
- 19 15. Man-Son-Hing M, Laupacis A, O'Connor AM, et al. A patient decision aid  
20 regarding antithrombotic therapy for stroke prevention in atrial fibrillation: a  
21 randomized controlled trial. *JAMA* 1999;282(8):737-43.  
22
- 23 16. McDowell M, Rebitschek FG, Gigerenzer G, et al. A Simple Tool for  
24 Communicating the Benefits and Harms of Health Interventions: A Guide for  
25 Creating a Fact Box. *MDM Policy & Practice* 2016;1(1):1-10. doi:  
26 10.1177/2381468316665365  
27
- 28 17. Agoritsas T, Heen AF, Brandt L, et al. Decision aids that really promote shared  
29 decision making: the pace quickens. *BMJ* 2015;350:g7624. doi:  
30 10.1136/bmj.g7624  
31
- 32 18. van der Pol M, Hennessy D, Manns B. The role of time and risk preferences in  
33 adherence to physician advice on health behavior change. *The European  
34 journal of health economics : HEPAC : health economics in prevention and  
35 care* 2016 doi: 10.1007/s10198-016-0800-7 [published Online First:  
36 2016/04/18]  
37
- 38 19. Yao X, Abraham NS, Alexander GC, et al. Effect of Adherence to Oral  
39 Anticoagulants on Risk of Stroke and Major Bleeding Among Patients With  
40 Atrial Fibrillation. *J Am Heart Assoc* 2016;5(2) doi: 10.1161/jaha.115.003074  
41 [published Online First: 2016/02/26]  
42
- 43 20. Aliot E, Breithardt G, Brugada J, et al. An international survey of physician and  
44 patient understanding, perception, and attitudes to atrial fibrillation and its  
45 contribution to cardiovascular disease morbidity and mortality. *Europace*  
46 2010;12(5):626-33. doi: 10.1093/europace/euq109  
47
- 48 21. Zhao S, Zhao H, Wang X, et al. Factors influencing medication knowledge and  
49 beliefs on warfarin adherence among patients with atrial fibrillation in China.  
50 *Patient preference and adherence* 2017;11:213-20. doi: 10.2147/ppa.s120962  
51 [published Online First: 2017/02/23]  
52
- 53 22. Lloyd AJ. The extent of patients' understanding of the risk of treatments. *Qual  
54 Health Care* 2001;10 Suppl 1:i14-8.  
55  
56  
57  
58  
59  
60

- 1  
2  
3 23. LaHaye SA, Gibbens SL, Ball DG, et al. A clinical decision aid for the selection of  
4 antithrombotic therapy for the prevention of stroke due to atrial fibrillation. *Eur*  
5 *Heart J* 2012;33(17):2163-71. doi: 10.1093/eurheartj/ehs167  
6
- 7 24. Olesen JB, Lip GY, Hansen PR, et al. Bleeding risk in 'real world' patients with  
8 atrial fibrillation: comparison of two established bleeding prediction schemes in  
9 a nationwide cohort. *J Thromb Haemost* 2011;9(8):1460-7. doi:  
10 10.1111/j.1538-7836.2011.04378.x  
11
- 12 25. Hart RG, Pearce LA, Aguilar MI. Meta-analysis: antithrombotic therapy to prevent  
13 stroke in patients who have nonvalvular atrial fibrillation. *Ann Intern Med*  
14 2007;146(12):857-67.  
15
- 16 26. Atrial Fibrillation Investigators. Risk factors for stroke and efficacy of  
17 antithrombotic therapy in atrial fibrillation. Analysis of pooled data from five  
18 randomized controlled trials. *Arch Intern Med* 1994;154(13):1449-57.  
19
- 20 27. Schulman S, Beyth RJ, Kearon C, et al. Hemorrhagic complications of  
21 anticoagulant and thrombolytic treatment: American College of Chest  
22 Physicians Evidence-Based Clinical Practice Guidelines (8th Edition). *Chest*  
23 2008;133(6 Suppl):257S-98S. doi: 10.1378/chest.08-0674  
24
- 25 28. You JJ, Singer DE, Howard PA, et al. Antithrombotic therapy for atrial fibrillation:  
26 Antithrombotic Therapy and Prevention of Thrombosis, 9th ed: American  
27 College of Chest Physicians Evidence-Based Clinical Practice Guidelines.  
28 *Chest* 2012;141(2 Suppl):e531S-75S. doi: 10.1378/chest.11-2304  
29
- 30 29. Mukaka M. A guide to appropriate use of Correlation coefficient in medical  
31 research. *Malawi Medical Journal : The Journal of Medical Association of*  
32 *Malawi* 2012;24(3):69-71.  
33
- 34 30. Caro JJ. An economic model of stroke in atrial fibrillation: the cost of suboptimal  
35 oral anticoagulation. *The American journal of managed care* 2004;10(14  
36 Suppl):S451-58; discussion S58-61. [published Online First: 2005/02/09]  
37
- 38 31. Casciano JP, Dotiwala ZJ, Martin BC, et al. The costs of warfarin underuse and  
39 nonadherence in patients with atrial fibrillation: a commercial insurer  
40 perspective. *Journal of managed care pharmacy : JMCP* 2013;19(4):302-16.  
41 doi: 10.18553/jmcp.2013.19.4.302 [published Online First: 2013/05/01]  
42
- 43 32. Ali AN, Howe J, Abdel-Hafiz A. Cost of acute stroke care for patients with atrial  
44 fibrillation compared with those in sinus rhythm. *PharmacoEconomics*  
45 2015;33(5):511-20. doi: 10.1007/s40273-015-0263-1 [published Online First:  
46 2015/02/20]  
47
- 48 33. Lang C, Seyfang L, Ferrari J, et al. Do Women With Atrial Fibrillation Experience  
49 More Severe Strokes? Results From the Austrian Stroke Unit Registry. *Stroke*  
50 2017 doi: 10.1161/strokeaha.116.015900 [published Online First: 2017/02/06]  
51
- 52 34. King RB. Quality of life after stroke. *Stroke* 1996;27(9):1467-72. [published Online  
53 First: 1996/09/01]  
54  
55  
56  
57  
58  
59  
60

- 1  
2  
3 35. Lane DA, Ponsford J, Shelley A, et al. Patient knowledge and perceptions of  
4 atrial fibrillation and anticoagulant therapy: effects of an educational  
5 intervention programme. The West Birmingham Atrial Fibrillation Project. *Int J*  
6 *Cardiol* 2006;110(3):354-8. doi: 10.1016/j.ijcard.2005.07.031  
7  
8 36. Arnsten JH, Gelfand JM, Singer DE. Determinants of compliance with  
9 anticoagulation: A case-control study. *Am J Med* 1997;103(1):11-7.  
10  
11 37. Dantas GC, Thompson BV, Manson JA, et al. Patients' perspectives on taking  
12 warfarin: qualitative study in family practice. *BMC Fam Pract* 2004;5:15. doi:  
13 10.1186/1471-2296-5-15  
14  
15 38. Lip GY, Agnelli G, Thach AA, et al. Oral anticoagulation in atrial fibrillation: A pan-  
16 European patient survey. *Eur J Intern Med* 2007;18(3):202-8. doi:  
17 10.1016/j.ejim.2006.11.005  
18  
19 39. Lip GY, Kamath S, Jafri M, et al. Ethnic differences in patient perceptions of atrial  
20 fibrillation and anticoagulation therapy: the West Birmingham Atrial Fibrillation  
21 Project. *Stroke* 2002;33(1):238-42.  
22  
23 40. McCabe PJ, Schad S, Hampton A, et al. Knowledge and self-management  
24 behaviors of patients with recently detected atrial fibrillation. *Heart Lung*  
25 2008;37(2):79-90. doi: 10.1016/j.hrtlng.2007.02.006  
26  
27 41. Mas Dalmau G, Sant Arderiu E, Enfedaque Montes MB, et al. Patients' and  
28 physicians' perceptions and attitudes about oral anticoagulation and atrial  
29 fibrillation: a qualitative systematic review. *BMC Fam Pract* 2017;18(1):3. doi:  
30 10.1186/s12875-016-0574-0 [published Online First: 2017/01/15]  
31  
32 42. Charles C, Whelan T, Gafni A. What do we mean by partnership in making  
33 decisions about treatment? *BMJ* 1999;319(7212):780-2.  
34  
35 43. Borg Xuereb C, Shaw RL, Lane DA. Patients' and health professionals' views and  
36 experiences of atrial fibrillation and oral-anticoagulant therapy: a qualitative  
37 meta-synthesis. *Patient Educ Couns* 2012;88(2):330-7. doi:  
38 10.1016/j.pec.2012.05.011 [published Online First: 2012/06/29]  
39  
40 44. LaHaye S, Regpala S, Lacombe S, et al. Evaluation of patients' attitudes towards  
41 stroke prevention and bleeding risk in atrial fibrillation. *Thromb Haemost*  
42 2014;111(3):465-73. doi: 10.1160/TH13-05-0424  
43  
44 45. Fuller R, Dudley N, Blacktop J. Risk communication and older people-  
45 understanding of probability and risk information by medical inpatients aged 75  
46 years and older. *Age Ageing* 2001;30(6):473-6. [published Online First:  
47 2001/12/18]  
48  
49 46. Vandvik PO, Brandt L, Alonso-Coello P, et al. Creating clinical practice guidelines  
50 we can trust, use, and share: a new era is imminent. *Chest* 2013;144(2):381-9.  
51 doi: 10.1378/chest.13-0746  
52  
53 47. Clarkesmith DE, Pattison HM, Lip GY, et al. Educational intervention improves  
54 anticoagulation control in atrial fibrillation patients: the TREAT randomised  
55 trial. *PLoS One* 2013;8(9):e74037. doi: 10.1371/journal.pone.0074037  
56  
57  
58  
59  
60

- 1  
2  
3 48. MacLean S, Mulla S, Akl EA, et al. Patient values and preferences in decision  
4 making for antithrombotic therapy: a systematic review: Antithrombotic  
5 Therapy and Prevention of Thrombosis, 9th ed: American College of Chest  
6 Physicians Evidence-Based Clinical Practice Guidelines. *Chest* 2012;141(2  
7 Suppl):e1S-23S. doi: 10.1378/chest.11-2290  
8  
9  
10 49. Devereaux PJ, Anderson DR, Gardner MJ, et al. Differences between  
11 perspectives of physicians and patients on anticoagulation in patients with  
12 atrial fibrillation: observational study. *BMJ* 2001;323(7323):1218-22.  
13  
14 50. Alonso-Coello P, Montori VM, Diaz MG, et al. Values and preferences for oral  
15 antithrombotic therapy in patients with atrial fibrillation: physician and patient  
16 perspectives. *Health Expect* 2014;18:2318-27. doi: 10.1111/hex.12201  
17  
18 51. National Clinical Guideline Centre. National Institute for Health and Clinical  
19 Excellence: Guidance. Atrial Fibrillation: The Management of Atrial Fibrillation.  
20 London: National Institute for Health and Care Excellence (UK) 2014.  
21  
22 52. Hendriks JM, Crijns HJ, Tieleman RG, et al. The atrial fibrillation knowledge  
23 scale: development, validation and results. *Int J Cardiol* 2013;168(2):1422-8.  
24 doi: 10.1016/j.ijcard.2012.12.047  
25  
26  
27  
28  
29  
30  
31  
32  
33  
34  
35  
36  
37  
38  
39  
40  
41  
42  
43  
44  
45  
46  
47  
48  
49  
50  
51  
52  
53  
54  
55  
56  
57  
58  
59  
60

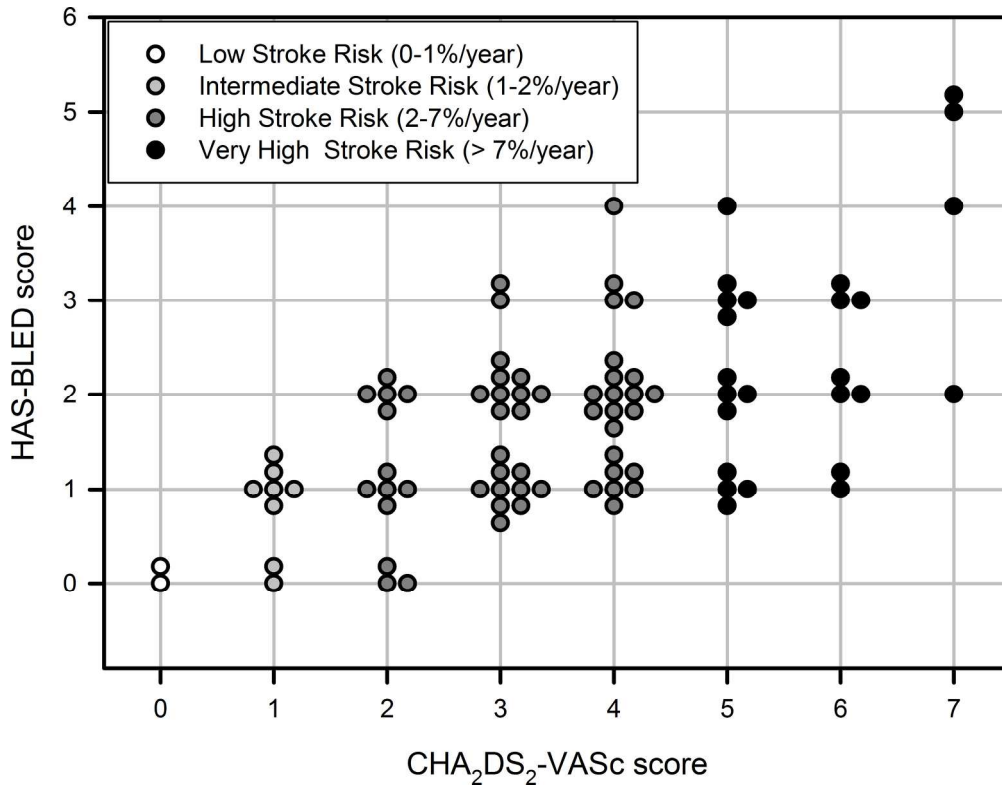

Figure 1: CHA<sub>2</sub>DS<sub>2</sub>-VASc and HAS-BLED scores of individual patients, including our classification into low, intermediate, high and very high stroke risk groups (stratified by CHA<sub>2</sub>DS<sub>2</sub>-VASc score).

107x83mm (600 x 600 DPI)

For peer review only

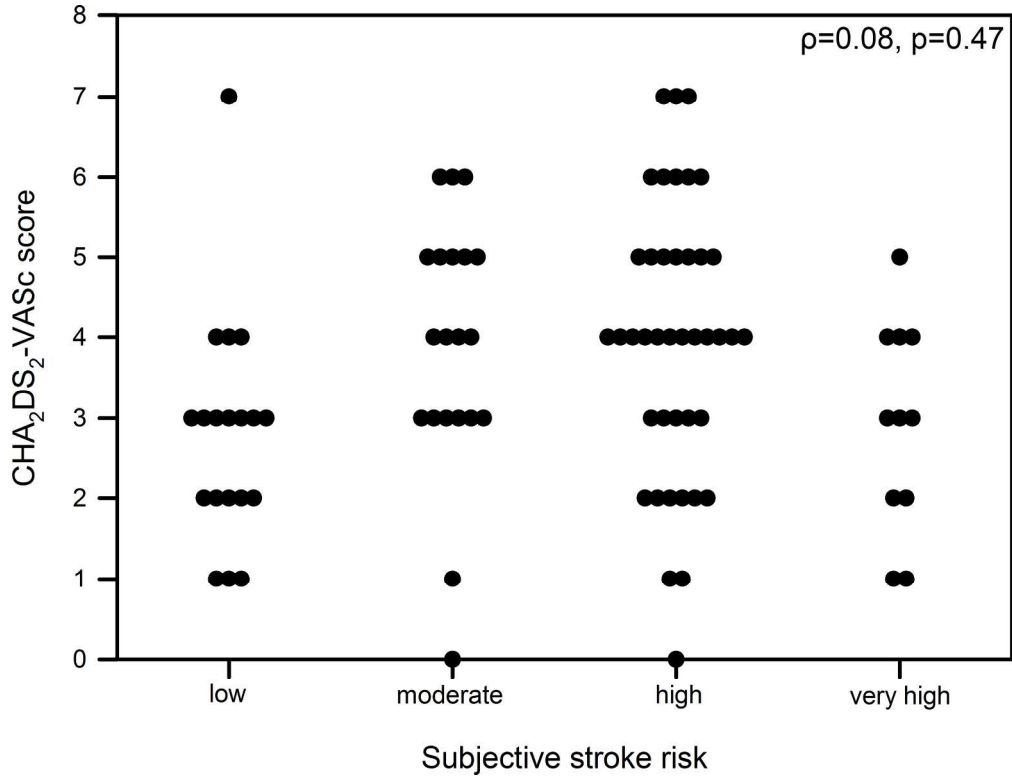

Figure 2: Correlation of CHA<sub>2</sub>DS<sub>2</sub>-VASc score and subjective assessed stroke risk.

107x82mm (600 x 600 DPI)

33  
34  
35  
36  
37  
38  
39  
40  
41  
42  
43  
44  
45  
46  
47  
48  
49  
50  
51  
52  
53  
54  
55  
56  
57  
58  
59  
60

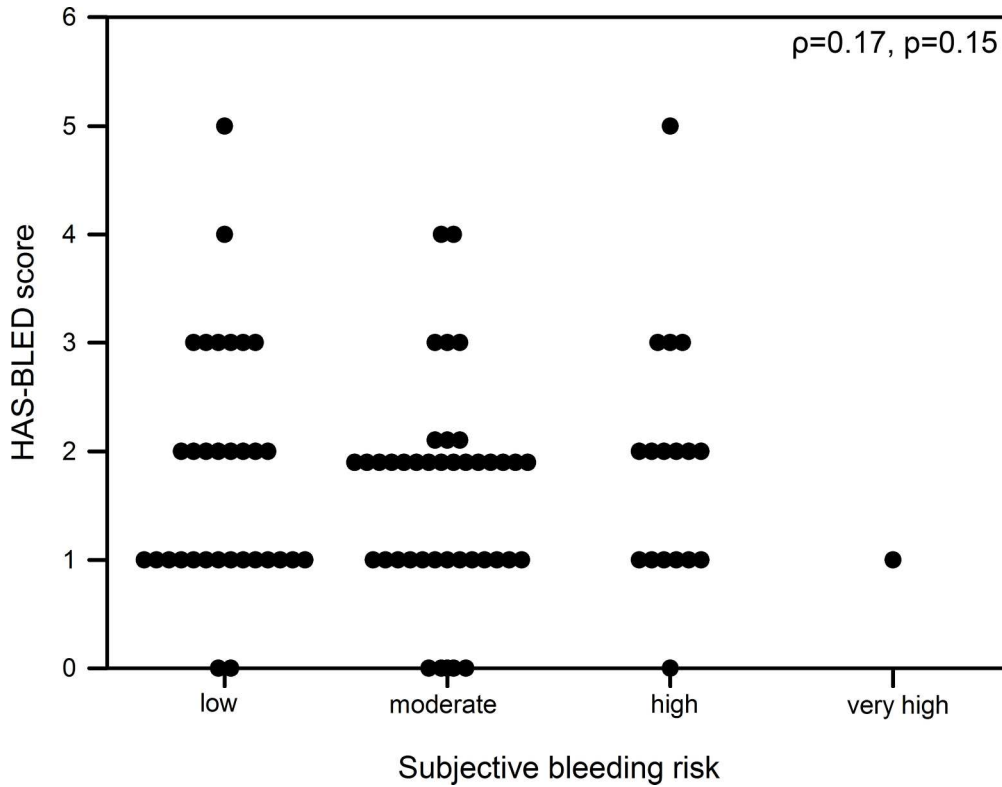

Figure 3: Correlation of HAS-BLED score and subjective assessed bleeding risk.

107x83mm (600 x 600 DPI)

Peer Review Only

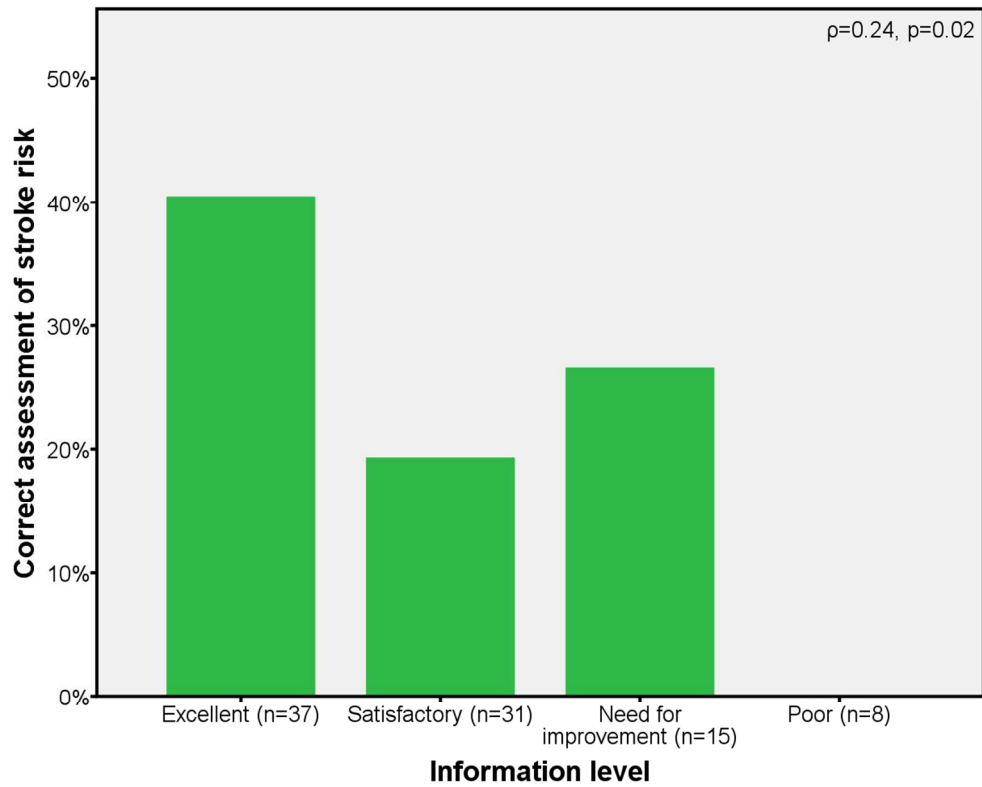

Figure 4: Amount of correct answered assessment of stroke risk in patients with different self-assessed levels of information.

437x349mm (72 x 72 DPI)



1  
2  
3  
4  
5  
6  
7  
8  
9  
10  
11  
12  
13  
14  
15  
16  
17  
18  
19  
20  
21  
22  
23  
24  
25  
26  
27  
28  
29  
30  
31  
32  
33  
34  
35  
36  
37  
38  
39  
40  
41  
42  
43  
44  
45  
46  
47  
48  
49  
50  
51  
52  
53  
54  
55  
56  
57  
58  
59  
60

# Mind the gap - atrial fibrillation patients and their physicians perceive risk and benefits of stroke prevention differently

David Zweiker<sup>1</sup>, Robert Zweiker<sup>1</sup>, Konstantina Roesch<sup>1</sup>, Martin Schumacher<sup>2</sup>,  
Vinzenc Stepan<sup>3</sup>, Peter Krippel<sup>4</sup>, Norbert Bauer<sup>5</sup>, Martin Heine<sup>6</sup>, Gerhard Reicht<sup>7</sup>,  
Gudrun Zweiker<sup>8</sup>, Martin Sprenger<sup>9</sup>, Norbert Watzinger<sup>10\*</sup>

<sup>1</sup> Division of Cardiology, Department of Internal Medicine, Medical University of Graz,  
Graz, Austria

<sup>2</sup> Department of Internal Medicine, Hospital Barmherzige Brueder Marschallgasse,  
Graz, Austria

<sup>3</sup> Department of Internal Medicine, Hospital Elisabethinen, Graz, Austria

<sup>4</sup> Department of Internal Medicine, LKH Fürstenfeld, Krankenhausverbund Feldbach-  
Fürstenfeld, Fürstenfeld, Austria

<sup>5</sup> Department of Internal Medicine, LKH Hartberg, Hartberg, Austria

<sup>6</sup> Department of Neurology, LKH Feldbach, Krankenhausverbund Feldbach-  
Fürstenfeld, Feldbach, Austria

<sup>7</sup> Department of Internal Medicine, Hospital Barmherzige Brueder Eggenberg, Graz,  
Austria

<sup>8</sup> General Practitioner, Straden, Austria

<sup>9</sup> Department of Social Medicine and Epidemiology, Medical University of Graz, Graz,  
Austria

<sup>10</sup> Department of Internal Medicine, LKH Feldbach, Krankenhausverbund Feldbach-  
Fürstenfeld, Feldbach, Austria

\* Corresponding author:

Norbert Watzinger, MD

Department of Internal Medicine, LKH Feldbach

Krankenhausverbund Feldbach-Fürstenfeld

Ottokar-Kernstock-Strasse 18

8330 Feldbach

Austria

email: [norbert.watzinger@lkh-feldbach.at](mailto:norbert.watzinger@lkh-feldbach.at)

phone: +43 3152 899 3201

fax: +43 3152 899 3209

## Supplemental material

**Supplemental tables****Part I: To be completed by the patient**

1) How do you judge the risk of stroke without anticoagulation?

- a) Low
- b) Intermediate
- c) High
- d) Very high

2) How do you judge the efficacy of the proposed therapy? How strong is the effect of anticoagulation to avoid a stroke?

- a) Low
- b) Intermediate
- c) High
- d) Very high

3) The bleeding risk depends on comorbidities. How do you judge the risk of severe haemorrhagic complications within one year?

- a) Low
- b) Intermediate
- c) High
- d) Very high

4) How do you judge the disadvantages of treatment? How do you think increases the risk of severe haemorrhage if you take your medication appropriately?

- a) Low
- b) Intermediate
- c) High
- d) Very high

1  
2  
3  
4  
5  
6  
7  
8  
9  
10  
11  
12  
13  
14  
15  
16  
17  
18  
19  
20  
21  
22  
23  
24  
25  
26  
27  
28  
29  
30  
31  
32  
33  
34  
35  
36  
37  
38  
39  
40  
41  
42  
43  
44  
45  
46  
47  
48  
49  
50  
51  
52  
53  
54  
55  
56  
57  
58  
59  
60

5) Would you discontinue anticoagulation therapy if minor bleedings would occur (e.g. haematoma, epistaxis, gum bleeding)

- a) Yes
- b) No
- c) I don't know

6) What do you fear more: stroke or bleeding complications?

- a) Stroke
- b) Bleeding
- c) I don't know

7) How do judge your general level of information regarding the disease "Atrial fibrillation" and the proposed therapy?

- a) Good
- b) Okay
- c) Improvable
- d) Bad

**Part II: To be completed by the physician**

1) Demographics

- a) Age (years):
- b) Gender: female/male
- c) Education: compulsory school/apprenticeship/vocational school/grammar school/vocational school with higher entrance qualification/university of applied sciences/university of general sciences

2) Planned type of anticoagulation

- a) Vitamin K antagonist (VKA)
- b) NOAC

- 1  
2  
3  
4  
5  
6  
7
- c) Low molecular weight heparin
  - d) Combination with antiplatelet

8  
9

### 3) CHA<sub>2</sub>DS<sub>2</sub>-VASc score

- 10  
11  
12  
13  
14  
15  
16  
17  
18  
19  
20  
21  
22  
23  
24  
25  
26  
27  
28
- a) C = Congestive heart failure / LV dysfunction
  - b) H = Hypertension
  - c) A<sub>2</sub> = Age ≥ 75 years
  - d) D = Diabetes mellitus
  - e) S<sub>2</sub> = Stroke/TIA/thrombo-embolism
  - f) V = Vascular disease
  - g) A = Age 65-74 years
  - h) S = Sex category (i.e. female sex)

29  
30

### 4) HAS-BLED Score

- 31  
32  
33  
34  
35  
36  
37  
38  
39  
40  
41  
42  
43  
44  
45  
46  
47  
48  
49  
50  
51  
52  
53  
54  
55  
56  
57  
58  
59  
60
- a) H = Uncontrolled hypertension (systolic blood pressure > 160 mmHg)
  - b) A = Abnormal renal function (presence of chronic dialysis or renal transplantation or serum creatinine ≥200 mmol/L) or abnormal liver function (chronic hepatic disease [e.g. cirrhosis] or biochemical evidence of significant hepatic derangement [e.g. bilirubin 2 x upper limit of normal, in association with aspartate aminotransferase/alanine aminotransferase/alkaline phosphatase .3 x upper limit normal]) (1 point each)
  - c) S = Stroke
  - d) B = Bleeding (previous bleeding history and/or predisposition to bleeding, e.g. bleeding diathesis, anaemia)
  - e) L = Labile INRs (unstable/high INRs or poor time in therapeutic range [e.g. < 60%])

f) D = Drugs or alcohol (concomitant use of drugs, such as antiplatelet agents, non-steroidal anti-inflammatory drugs, or alcohol abuse) (1 point each)

**Supplemental table S1.** Questionnaire (English translation). LV: left ventricle; TIA: transitory ischaemic attack; INR: international normalized range

|                                                          |          |
|----------------------------------------------------------|----------|
| <b>Patients per centre</b>                               |          |
| LKH Feldbach, Department of Internal Medicine            | 36 (40%) |
| Medical University of Graz, Division of Cardiology       | 18 (20%) |
| BHB Graz-Marschallgasse, Department of Internal Medicine | 9 (10%)  |
| KH Elisabethinen Graz, Department of Internal Medicine   | 8 (9%)   |
| LKH Feldbach, Department of Neurology                    | 6 (7%)   |
| LKH Fürstenfeld, Department of Internal Medicine         | 5 (6%)   |
| LKH Hartberg, Department of Internal Medicine            | 5 (6%)   |
| BHB Graz-Eggenberg, Department of Internal Medicine      | 2 (2%)   |
| Zweiker, MD, General Practitioner                        | 2 (2%)   |
| <b>Highest completed education (ISCED level)</b>         |          |
| Lower secondary education (2)                            | 32 (35%) |
| Upper secondary vocational education (3B)                | 25 (28%) |
| Upper secondary general education (3A)                   | 8 (9%)   |

|                                                       |        |
|-------------------------------------------------------|--------|
| Upper secondary vocational education (3C)             | 4 (4%) |
| Tertiary general education (5A)                       | 3 (3%) |
| Post-secondary non-tertiary vocational education (4A) | 2 (2%) |
| Tertiary vocational education (5A)                    | 1 (1%) |

**Supplemental table S2.** Demographics of included patients. ISCED: International Standard Classification of Education.

1  
2  
3  
4  
5  
6  
7  
8  
9  
10  
11  
12  
13  
14  
15  
16  
17  
18  
19  
20  
21  
22  
23  
24  
25  
26  
27  
28  
29  
30  
31  
32  
33  
34  
35  
36  
37  
38  
39  
40  
41  
42  
43  
44  
45  
46  
47  
48  
49  
50  
51  
52  
53  
54  
55  
56  
57  
58  
59  
60

## STROBE Statement—checklist of items that should be included in reports of observational studies

|                           | Item No | Recommendation                                                                                                                                                                                                                                                                                                                                                                                                                                                         | Information can be found in page |
|---------------------------|---------|------------------------------------------------------------------------------------------------------------------------------------------------------------------------------------------------------------------------------------------------------------------------------------------------------------------------------------------------------------------------------------------------------------------------------------------------------------------------|----------------------------------|
| <b>Title and abstract</b> | 1       | (a) Indicate the study's design with a commonly used term in the title or the abstract                                                                                                                                                                                                                                                                                                                                                                                 | Abstract                         |
|                           |         | (b) Provide in the abstract an informative and balanced summary of what was done and what was found                                                                                                                                                                                                                                                                                                                                                                    | Abstract                         |
| <b>Introduction</b>       |         |                                                                                                                                                                                                                                                                                                                                                                                                                                                                        |                                  |
| Background/rationale      | 2       | Explain the scientific background and rationale for the investigation being reported                                                                                                                                                                                                                                                                                                                                                                                   | 5-6                              |
| Objectives                | 3       | State specific objectives, including any prespecified hypotheses                                                                                                                                                                                                                                                                                                                                                                                                       | 6                                |
| <b>Methods</b>            |         |                                                                                                                                                                                                                                                                                                                                                                                                                                                                        |                                  |
| Study design              | 4       | Present key elements of study design early in the paper                                                                                                                                                                                                                                                                                                                                                                                                                | 7                                |
| Setting                   | 5       | Describe the setting, locations, and relevant dates, including periods of recruitment, exposure, follow-up, and data collection                                                                                                                                                                                                                                                                                                                                        | 7;10                             |
| Participants              | 6       | (a) <i>Cohort study</i> —Give the eligibility criteria, and the sources and methods of selection of participants. Describe methods of follow-up<br><i>Case-control study</i> —Give the eligibility criteria, and the sources and methods of case ascertainment and control selection. Give the rationale for the choice of cases and controls<br><i>Cross-sectional study</i> —Give the eligibility criteria, and the sources and methods of selection of participants | 7                                |
|                           |         | (b) <i>Cohort study</i> —For matched studies, give matching criteria and number of exposed and unexposed<br><i>Case-control study</i> —For matched studies, give matching criteria and the number of controls per case                                                                                                                                                                                                                                                 | Not applicable                   |
| Variables                 | 7       | Clearly define all outcomes, exposures, predictors, potential confounders, and effect modifiers. Give diagnostic criteria, if applicable                                                                                                                                                                                                                                                                                                                               | 7-8                              |
| Data sources/measurement  | 8*      | For each variable of interest, give sources of data and details of methods of assessment (measurement). Describe comparability of assessment methods if there is more than one group                                                                                                                                                                                                                                                                                   | 7-8                              |
| Bias                      | 9       | Describe any efforts to address potential sources of bias                                                                                                                                                                                                                                                                                                                                                                                                              | 16                               |
| Study size                | 10      | Explain how the study size was arrived at                                                                                                                                                                                                                                                                                                                                                                                                                              | 9                                |
| Quantitative variables    | 11      | Explain how quantitative variables were handled in the analyses. If applicable, describe which groupings were chosen and why                                                                                                                                                                                                                                                                                                                                           | 8                                |
| Statistical methods       | 12      | (a) Describe all statistical methods, including those used to control for confounding                                                                                                                                                                                                                                                                                                                                                                                  | 9                                |
|                           |         | (b) Describe any methods used to examine subgroups and interactions                                                                                                                                                                                                                                                                                                                                                                                                    | 9                                |
|                           |         | (c) Explain how missing data were addressed                                                                                                                                                                                                                                                                                                                                                                                                                            | 9                                |
|                           |         | (d) <i>Cohort study</i> —If applicable, explain how loss to follow-up                                                                                                                                                                                                                                                                                                                                                                                                  | 9                                |

was addressed

*Case-control study*—If applicable, explain how matching of cases and controls was addressed

*Cross-sectional study*—If applicable, describe analytical methods taking account of sampling strategy

(e) Describe any sensitivity analyses 9

## Results

|                          |     |                                                                                                                                                                                                              |                          |
|--------------------------|-----|--------------------------------------------------------------------------------------------------------------------------------------------------------------------------------------------------------------|--------------------------|
| Participants             | 13* | (a) Report numbers of individuals at each stage of study—eg numbers potentially eligible, examined for eligibility, confirmed eligible, included in the study, completing follow-up, and analysed            | 10                       |
|                          |     | (b) Give reasons for non-participation at each stage                                                                                                                                                         | 10                       |
|                          |     | (c) Consider use of a flow diagram                                                                                                                                                                           | Not applicable           |
| Descriptive data         | 14* | (a) Give characteristics of study participants (eg demographic, clinical, social) and information on exposures and potential confounders                                                                     | 10                       |
|                          |     | (b) Indicate number of participants with missing data for each variable of interest                                                                                                                          | 10-12                    |
|                          |     | (c) <i>Cohort study</i> —Summarise follow-up time (eg, average and total amount)                                                                                                                             | Not applicable           |
| Outcome data             | 15* | <i>Cohort study</i> —Report numbers of outcome events or summary measures over time                                                                                                                          | Not applicable           |
|                          |     | <i>Case-control study</i> —Report numbers in each exposure category, or summary measures of exposure                                                                                                         | Not applicable           |
|                          |     | <i>Cross-sectional study</i> —Report numbers of outcome events or summary measures                                                                                                                           | 10-12                    |
| Main results             | 16  | (a) Give unadjusted estimates and, if applicable, confounder-adjusted estimates and their precision (eg, 95% confidence interval). Make clear which confounders were adjusted for and why they were included | 10-12                    |
|                          |     | (b) Report category boundaries when continuous variables were categorized                                                                                                                                    | 10                       |
|                          |     | (c) If relevant, consider translating estimates of relative risk into absolute risk for a meaningful time period                                                                                             | Not relevant             |
| Other analyses           | 17  | Report other analyses done—eg analyses of subgroups and interactions, and sensitivity analyses                                                                                                               | Not applicable           |
| <b>Discussion</b>        |     |                                                                                                                                                                                                              |                          |
| Key results              | 18  | Summarise key results with reference to study objectives                                                                                                                                                     | 13-15                    |
| Limitations              | 19  | Discuss limitations of the study, taking into account sources of potential bias or imprecision. Discuss both direction and magnitude of any potential bias                                                   | 16                       |
| Interpretation           | 20  | Give a cautious overall interpretation of results considering objectives, limitations, multiplicity of analyses, results from similar studies, and other relevant evidence                                   | 13-15                    |
| Generalisability         | 21  | Discuss the generalisability (external validity) of the study results                                                                                                                                        | 14-15                    |
| <b>Other information</b> |     |                                                                                                                                                                                                              |                          |
| Funding                  | 22  | Give the source of funding and the role of the funders for the present study and, if applicable, for the original study on which the present article is based                                                | Transparency declaration |



1  
2  
3  
4  
5  
6  
7  
8  
9  
10  
11  
12  
13  
14  
15  
16  
17  
18  
19  
20  
21  
22  
23  
24  
25  
26  
27  
28  
29  
30  
31  
32  
33  
34  
35  
36  
37  
38  
39  
40  
41  
42  
43  
44  
45  
46  
47  
48  
49  
50  
51  
52  
53  
54  
55  
56  
57  
58  
59  
60

\*Give information separately for cases and controls in case-control studies and, if applicable, for exposed and unexposed groups in cohort and cross-sectional studies.

**Note:** An Explanation and Elaboration article discusses each checklist item and gives methodological background and published examples of transparent reporting. The STROBE checklist is best used in conjunction with this article (freely available on the Web sites of PLoS Medicine at <http://www.plosmedicine.org/>, Annals of Internal Medicine at <http://www.annals.org/>, and Epidemiology at <http://www.epidem.com/>). Information on the STROBE Initiative is available at [www.strobe-statement.org](http://www.strobe-statement.org).

For peer review only

# BMJ Open

## Association between subjective risk perception and objective risk estimation in atrial fibrillation patients: a cross-sectional study.

|                                 |                                                                                                                                                                                                                                                                                                                                                                                                                                                                                                                                                                                                                                                                                                                                                                                                                                                                                                                                                                                                                                                                                                                                                                       |
|---------------------------------|-----------------------------------------------------------------------------------------------------------------------------------------------------------------------------------------------------------------------------------------------------------------------------------------------------------------------------------------------------------------------------------------------------------------------------------------------------------------------------------------------------------------------------------------------------------------------------------------------------------------------------------------------------------------------------------------------------------------------------------------------------------------------------------------------------------------------------------------------------------------------------------------------------------------------------------------------------------------------------------------------------------------------------------------------------------------------------------------------------------------------------------------------------------------------|
| Journal:                        | <i>BMJ Open</i>                                                                                                                                                                                                                                                                                                                                                                                                                                                                                                                                                                                                                                                                                                                                                                                                                                                                                                                                                                                                                                                                                                                                                       |
| Manuscript ID                   | bmjopen-2017-018242.R1                                                                                                                                                                                                                                                                                                                                                                                                                                                                                                                                                                                                                                                                                                                                                                                                                                                                                                                                                                                                                                                                                                                                                |
| Article Type:                   | Research                                                                                                                                                                                                                                                                                                                                                                                                                                                                                                                                                                                                                                                                                                                                                                                                                                                                                                                                                                                                                                                                                                                                                              |
| Date Submitted by the Author:   | 17-Aug-2017                                                                                                                                                                                                                                                                                                                                                                                                                                                                                                                                                                                                                                                                                                                                                                                                                                                                                                                                                                                                                                                                                                                                                           |
| Complete List of Authors:       | Zweiker, David; Medizinische Universitat Graz, Division of Cardiology, Department of Internal Medicine<br>Zweiker, Robert; Medizinische Universitat Graz, Division of Cardiology, Department of Internal Medicine<br>Winkler, Elisabeth; Medizinische Universitat Graz, Division of Cardiology, Department of Internal Medicine<br>Roesch, Konstantina; Medizinische Universitat Graz, Division of Cardiology, Department of Internal Medicine<br>Schumacher, Martin; Krankenhaus Barmherzige Bruder Graz, Department of Internal Medicine<br>Stepan, Vinzenz; Krankenhaus der Elisabethinen, Department of Internal Medicine<br>Krippel, Peter; Landeskrankenhaus Furstenfeld, Department of Internal Medicine<br>Bauer, Norbert; Landeskrankenhaus Hartberg, Department of Internal Medicine<br>Heine, Martin; Landeskrankenhaus Feldbach, Department of Neurology<br>Reicht, Gerhard; Krankenhaus Barmherzige Bruder Graz-Eggenberg<br>Zweiker, Gudrun; General Practitioner<br>Sprenger, Martin; Medizinische Universitat Graz, Department of Social Medicine and Epidemiology<br>Watzinger, Norbert; Landeskrankenhaus Feldbach, Department of Internal Medicine |
| <b>Primary Subject Heading</b>: | Cardiovascular medicine                                                                                                                                                                                                                                                                                                                                                                                                                                                                                                                                                                                                                                                                                                                                                                                                                                                                                                                                                                                                                                                                                                                                               |
| Secondary Subject Heading:      | Cardiovascular medicine                                                                                                                                                                                                                                                                                                                                                                                                                                                                                                                                                                                                                                                                                                                                                                                                                                                                                                                                                                                                                                                                                                                                               |
| Keywords:                       | Anticoagulation < HAEMATOLOGY, CARDIOLOGY, Cardiology < INTERNAL MEDICINE                                                                                                                                                                                                                                                                                                                                                                                                                                                                                                                                                                                                                                                                                                                                                                                                                                                                                                                                                                                                                                                                                             |
|                                 |                                                                                                                                                                                                                                                                                                                                                                                                                                                                                                                                                                                                                                                                                                                                                                                                                                                                                                                                                                                                                                                                                                                                                                       |

SCHOLARONE™  
Manuscripts

1  
2  
3  
4 **Association between subjective risk perception and**  
5  
6  
7 **objective risk estimation in atrial fibrillation patients: a**  
8  
9  
10 **cross-sectional study.**  
11

12  
13 David Zweiker<sup>1</sup>, Robert Zweiker<sup>1</sup>, Elisabeth Winkler<sup>1</sup>, Konstantina Roesch<sup>1</sup>, Martin  
14 Schumacher<sup>2</sup>, Vinzenz Stepan<sup>3</sup>, Peter Krippel<sup>4</sup>, Norbert Bauer<sup>5</sup>, Martin Heine<sup>6</sup>,  
15  
16 Gerhard Reich<sup>7</sup>, Gudrun Zweiker<sup>8</sup>, Martin Sprenger<sup>9</sup>, Norbert Watzinger<sup>10\*</sup>  
17  
18  
19

20  
21 <sup>1</sup> Division of Cardiology, Department of Internal Medicine, Medical University of Graz,  
22  
23 Graz, Austria  
24

25  
26 <sup>2</sup> Department of Internal Medicine, Hospital Barmherzige Brueder Marschallgasse,  
27  
28 Graz, Austria  
29

30  
31 <sup>3</sup> Department of Internal Medicine, Hospital Elisabethinen, Graz, Austria  
32

33  
34 <sup>4</sup> Department of Internal Medicine, LKH Fürstenfeld, Krankenhausverbund Feldbach-  
35  
36 Fürstenfeld, Fürstenfeld, Austria  
37

38  
39 <sup>5</sup> Department of Internal Medicine, LKH Hartberg, Hartberg, Austria  
40

41  
42 <sup>6</sup> Department of Neurology, LKH Feldbach, Krankenhausverbund Feldbach-  
43  
44 Fürstenfeld, Feldbach, Austria  
45

46  
47 <sup>7</sup> Department of Internal Medicine, Hospital Barmherzige Brueder Eggenberg, Graz,  
48  
49 Austria  
50

51  
52 <sup>8</sup> General Practitioner, Straden, Austria  
53

54  
55 <sup>9</sup> Department of Social Medicine and Epidemiology, Medical University of Graz, Graz,  
56  
57 Austria  
58

59  
60 <sup>10</sup> Department of Internal Medicine, LKH Feldbach, Krankenhausverbund Feldbach-  
Fürstenfeld, Feldbach, Austria

1  
2  
3 \* Corresponding author:  
4

5 Norbert Watzinger, MD  
6

7 Department of Internal Medicine, LKH Feldbach  
8

9 Krankenhausverbund Feldbach-Fürstenfeld  
10

11 Ottokar-Kernstock-Strasse 18  
12

13 8330 Feldbach  
14

15 Austria  
16

17  
18 email: [norbert.watzinger@lkh-feldbach.at](mailto:norbert.watzinger@lkh-feldbach.at)  
19

20  
21 phone: +43 3152 899 3201  
22

23 fax: +43 3152 899 3209  
24  
25  
26  
27  
28  
29  
30  
31  
32  
33  
34  
35  
36  
37  
38  
39  
40  
41  
42  
43  
44  
45  
46  
47  
48  
49  
50  
51  
52  
53  
54  
55  
56  
57  
58  
59  
60

## Abstract

### Objective

Oral anticoagulation (OAC) is state-of-the-art therapy for atrial fibrillation (AF), the most common arrhythmia worldwide. However, little is known about the perception of AF patients and how it correlates with risk scores used by their physicians. Therefore, we correlated patients' estimates of their own stroke and bleeding risk with the objectively predicted individual risk using CHA<sub>2</sub>DS<sub>2</sub>-VASc and HAS-BLED scores.

### Design

Cross-sectional prevalence study using convenience sampling and telephone follow up.

### Settings

Eight hospital departments and one general practitioner in Austria. Patients' perception of stroke and bleeding risk was opposed to commonly used risk scoring.

### Participants

Patients with newly diagnosed AF and indication for anticoagulation.

### Main Outcome Measures

Comparison of subjective risk perception with CHA<sub>2</sub>DS<sub>2</sub>-VASc and HAS-BLED scores showing possible discrepancies between subjective and objective risk estimation. Patients' judgement of their own knowledge on AF and education were also correlated with accuracy of subjective risk appraisal.

### Results

1  
2  
3 Ninety-one patients (age 73±11 years, 45% female) were included in this study.  
4  
5 Subjective stroke and bleeding risk estimation did not correlate with risk scores  
6  
7 ( $\rho=0.08$  and  $\rho=0.17$ ). The majority of patients (57%) underestimated the individual  
8  
9 stroke risk. Patients feared stroke more than bleeding (67% vs. 10%). There was no  
10  
11 relationship between accurate perception of stroke and bleeding risks and education  
12  
13 level. However, we found a correlation between the patients' judgement of their own  
14  
15 knowledge of AF and correct assessment of individual stroke risk ( $\rho=0.24$ ,  $\rho=0.02$ ).  
16  
17 During follow up, patients experienced the following events: death (n=5), stroke  
18  
19 (n=2), bleeding (n=1). OAC discontinuation rate despite indication was 3%.  
20  
21  
22  
23

## 24 **Conclusions**

25  
26  
27 In this cross-sectional analysis of OAC-naïve AF patients, we found major differences  
28  
29 between patients' perceptions and physicians' assessments of risks and benefits of  
30  
31 OAC. To ensure shared decision-making and informed consent, more attention  
32  
33 should be given to evidence-based and useful communication strategies.  
34  
35  
36

## 37 **Trial registration**

38  
39  
40 NCT03061123  
41  
42

## 43 **Key words**

44  
45  
46  
47 Atrial fibrillation, oral anticoagulation, questionnaire, self-assessment  
48  
49  
50  
51  
52  
53  
54  
55  
56  
57  
58  
59  
60

## Article summary

### Strengths and limitations

- The design of this cross-sectional study allowed the objective assessment of the patients' risk perception immediately after initiation of anticoagulation for atrial fibrillation.
- For generalizability, primary, secondary and tertiary health care centres were included in this study.
- To evaluate long-time outcome, follow up was obtained via telephone.
- The study is statistically powered for the cross-sectional comparison, but the number of patients included does not allow association between baseline characteristics and events during follow up.

## Introduction

Atrial fibrillation (AF) is the most common significant arrhythmia worldwide, associated with a fivefold increase in risk for stroke<sup>1</sup> and almost doubles the risk of mortality.<sup>2</sup> In an ageing population, the number of individuals affected is projected to increase exponentially over the next decades.<sup>3</sup> Since the early 1990's, oral anticoagulation (OAC) is the state-of-the-art therapy for reducing stroke and embolic events.<sup>2</sup> OAC is considered a long-term, often lifelong medical intervention. Therefore, clinicians and particularly patients need to have a clear understanding of the related benefits and immanent harms.<sup>4</sup> It serves as a reasonable background for shared-decision making of patients and their doctors, one of the most important principles for patients' reliance, compliance and adherence to recommended medical strategies.<sup>5,6</sup>

Adequate information of patients<sup>7</sup> and increased health literacy<sup>8</sup> are of major importance for compliance and adherence to therapy. Patients' knowledge also affects the perception of risk for stroke, embolic events and bleeding. It has been shown that the extent of information perceived influenced patients' preferences towards or against OAC treatment the most.<sup>9</sup>

Clinicians use algorithms like CHA<sub>2</sub>DS<sub>2</sub>-VASc and HAS-BLED scores<sup>10-12</sup> to predict the balance of future risk for stroke and embolic events versus bleeding in an individual patient. A recent survey of the European Heart Rhythm Association proved that a considerable amount of time and resources are needed in daily clinical practice to communicate risk / benefit ratios to patients suffering from AF: Several centres have established special OAC clinics and initial visits mostly lasted 21-30 minutes.<sup>13</sup> However, decades after the introduction of OAC therapy, standardised and validated



1  
2  
3 risk communication tools<sup>14-16</sup> are still missing and adherence follow-up programmes  
4  
5 are rare.<sup>13</sup> Those programmes have an important impact on effectiveness of OAC:  
6  
7 Adherence to OAC is considered a key factor for preventing events,<sup>17</sup> but it is still as  
8  
9 low as 43%.<sup>18</sup>  
10

11  
12 Little is known about the perception of AF patients and how it correlates with risk  
13  
14 scores used by their physicians.<sup>19</sup> A potential gap between subjective and objective  
15  
16 assessments may increase the likelihood of non-compliance to OAC in AF patients.<sup>20</sup>  
17  
18 Therefore, the study was designed to correlate the subjective stroke and bleeding  
19  
20 risk with the objectively predicted individual risks calculated by CHA<sub>2</sub>DS<sub>2</sub>-VASc and  
21  
22 HAS-BLED scores.  
23  
24  
25  
26  
27  
28  
29  
30  
31  
32  
33  
34  
35  
36  
37  
38  
39  
40  
41  
42  
43  
44  
45  
46  
47  
48  
49  
50  
51  
52  
53  
54  
55  
56  
57  
58  
59  
60

## Methods

This work is a cross-sectional prevalence study, using convenience sampling by trained doctors at nine centres (representing primary, secondary and tertiary health care) in the province of Styria, Austria. Responsible institutional review boards approved the study (1376/2015 [BHB Graz, Austria], 28-004 ex 15/16 [Medical University of Graz, Austria]). Furthermore, the study was registered under the ClinicalTrials.gov number NCT03061123. Patients with first diagnosed and ECG-documented non-valvular AF and indication for OAC were included in the study. Exclusion criteria were pre-existing OAC therapy, valvular heart disease, history of valve surgery, denial or inability of informed consent.

This study was designed to comply with standard operating procedures of individual centres for initiation of OAC therapy. Responsible physicians were asked to include all eligible patients. Immediately after the pre-treatment interviews, which included the discussion of benefits, harms and side effects of OAC, patients were asked to participate in the study. After informed consent was signed, a standardized questionnaire was handed out to all patients (supplemental table S1).

### **Questionnaire**

The survey was conducted using a standardized questionnaire with two parts (supplemental table S1). The patient-oriented part consisted of seven questions covering subjective perception of patients with regard to general individual risk/benefit ratios of OAC in AF, the willingness of therapy continuation even in the possible case of minor adverse effects (haematoma, minor bleeding) and the individually discerned level of information. We used 3- and 4-point verbal rating scales to comply with the patients' categorical perception of checks and balances.<sup>21</sup>

1  
2  
3 Physicians in charge of patients filled the second part, which included patient  
4 demographics, CHA<sub>2</sub>DS<sub>2</sub>-VASc and HAS-BLED scores, as well as the intended OAC  
5 therapy.  
6  
7

8  
9  
10 CHA<sub>2</sub>DS<sub>2</sub>-VASc and HAS-BLED scores were stratified into four risk categories each  
11 corresponding to the four different risk levels for stroke/embolic events and bleeding  
12 interrogated by the patient questionnaire. Risk estimations were based on published  
13 data from large population studies. Regarding CHA<sub>2</sub>DS<sub>2</sub>-VASc score, patients with  
14 zero points (stroke rate 0-1%/year) were considered *low risk*, one point (stroke rate 1-  
15 2%/year) *intermediate risk*, 2-4 points (stroke rate 2-7%/year) *high risk* and  $\geq 5$  points  
16 (stroke rate  $> 7\%$ /year) *very high risk* cohort.<sup>10 22 23</sup> The corresponding categories  
17 concerning HAS-BLED score were as follows: no or one risk factor (*low risk* group,  
18 bleeding rate 0-4%/year), two risk factors (*intermediate risk* group, bleeding rate 4-  
19 6%/year), 3 or 4 risk factors (*high risk* group, bleeding rate 6-10%/year) and 5 or  
20 more risk factors (*very high risk* group, bleeding rate  $> 10\%$ /year).<sup>11 22</sup>  
21  
22  
23  
24  
25  
26  
27  
28  
29  
30  
31  
32  
33  
34  
35

36 For assessing the awareness of general benefit of OAC, we asked patients to  
37 estimate their appraisal of relative risk reduction (RRR) for stroke and embolic  
38 events. We defined *high* (RRR 50-74%) as an accurate answer,<sup>24</sup> others were  
39 *low* (RRR 0-24%), *intermediate* (RRR 25-49%) and *very high* (RRR 75-100%). We  
40 extrapolated predicted hazard ratios (HR) of bleeding due to OAC from meta-  
41 analyses<sup>24-27</sup> and defined the general risk of OAC as *intermediate* (HR 1.25-1.49).  
42  
43  
44  
45  
46  
47  
48  
49  
50  
51  
52  
53  
54  
55  
56  
57  
58  
59  
60  
Other options were *low* (HR 1.00-1.24), *high* (HR 1.50-2.00) and *very high* (HR  $>$   
2.00). Subjective scales were interpreted as “correct” if they corresponded correctly  
to individual objective risk groups.

## ***Follow up***

Follow up was obtained by phone calls. Patients were asked about their current status of OAC therapy and the occurrence of cardiovascular or bleeding events.

## ***Statistical analysis***

Sample size calculation was performed using the freeware tool G\*Power by Heinrich Heine University Düsseldorf (<http://www.gpower.hhu.de>). We sought to oppose the self-reported benefits and risks of OAC with an actual assessment using validated data (including CHA<sub>2</sub>DS<sub>2</sub>-VASc Score and HAS-BLED Score). To prove correlation ( $|\rho| < 0.3$ ) with type I error ( $\alpha$ ) of 0.05 and power ( $1 - \beta$ ) of 80%, at least 84 patients had to be included into the study.

Two-sided significance level was 0.05. Data are presented as mean  $\pm$  standard deviation, median (interquartile range) or count (proportion), where appropriate. Pearson's test and Spearman's rank correlation coefficient were used to correlate ordinal variables (e.g. subjective perceptions and risk scores). Correlation coefficients (i.e.  $|r|$ ,  $|\rho|$ ) were interpreted as follows: negligible correlation (0.0-0.3), low correlation (0.3-0.5), moderate correlation (0.5-0.8) and strong correlation (0.8-1.0).<sup>28</sup>

Data were analysed with IBM® SPSS® Statistics version 23 (IBM Corporation, Armonk, NY). All raw data can be found in the supplemental file.

## Results

### *Patient population*

From September 2015 to March 2016, 91 patients (age  $73 \pm 11$  years, 45% female) from nine centres were included in this study (supplemental table S2). As highest educational attainment, lower secondary education (ISCED level 2,  $n=32$ , 35%) and higher secondary vocational education (ISCED level 3B  $n=25$ , 28%) were most prevalent. New oral anticoagulants (NOACs) were used most frequently ( $n=75$ , 82%). vitamin K antagonists ( $n=14$ , 15%) and low-molecular weight heparin ( $n=2$ , 2%) were given to remaining patients.

### *Objective risk estimation*

Median CHA<sub>2</sub>DS<sub>2</sub>-VASc-Score was 4 (interquartile range 2-5). Therefore, we summarized most patients on high risk for stroke or embolic events (CHA<sub>2</sub>DS<sub>2</sub>-VASc score 2-4, stroke risk 2-7%/year, figure 1). Most common risk factors were arterial hypertension and age > 75 years (table 1). In terms of HAS-BLED score, most of patients were in low (0-1 points, bleeding risk 0–4 %) and intermediate risk groups (2 points, bleeding risk 4–6 %; figure 1).

### *Perception of individual risk*

Many patients ( $n=41$ , 45%) interpreted risk for stroke and embolic events in atrial fibrillation as *high* (corresponding stroke risk 2-7% per year). Bleeding risk was estimated mainly as *intermediate* (corresponding bleeding risk 4-6% per year,  $n=40$ , 44%). Patients feared stroke more than bleeding (67% vs. 10%) and only 9% would discontinue OAC therapy if minor bleeding complications (e.g. epistaxis) would occur.

1  
2  
3 Patients estimated their personal level of information as *good* or *adequate* in 41%  
4  
5 and 34%, respectively.  
6  
7

## 8 **Correlations**

9

10  
11 Patients estimated their risk for stroke or embolic events in concordance to the  
12  
13 individual CHA<sub>2</sub>DS<sub>2</sub>-VASc score in 28% (n=25) of cases, but by the majority (n=52,  
14  
15 57%) risk was underrated. Bleeding risk was assumed accurately in 41% (n=37), but  
16  
17 overestimated in 31 cases (34%). There were no significant correlations neither  
18  
19 between objectively assessed and subjectively expected risk for stroke nor for  
20  
21 bleeding ( $p=0.08$ ,  $p=0.47$ , figure 2 and  $p<0.01$ ,  $p=0.98$ , figure 3).  
22  
23  
24

25  
26 Analogies in patients' answers and CHA<sub>2</sub>DS<sub>2</sub>-VASc and HAS-BLED scores did not  
27  
28 correlate to the levels of highest education ( $p=-0.06$ ,  $p=0.64$  and  $p=0.17$ ,  $p=0.15$ ).  
29  
30 However, we observed a significant correlation between patients' judgement of their  
31  
32 knowledge of AF with regard to concordant assumptions of stroke risk and CHA<sub>2</sub>DS<sub>2</sub>-  
33  
34 VASc score ( $p=0.24$ ,  $p=0.02$ , figure 4). No correlation was observed between  
35  
36 patients' judgement of AF knowledge and concordance with subjectively assumed  
37  
38 and objectively predicted risk for bleeding events ( $p=0.08$ ,  $p=0.45$ ).  
39  
40  
41

## 42 **Perception of general risk**

43

44  
45 Most patients (n=51, 56%) assumed score-predicted effectiveness of OAC in AF as  
46  
47 *high* (corresponding stroke risk reduction 50-74%). Other answers were *very high*  
48  
49 (RRR 75-100%; n=23, 25%), *intermediate* (RRR 25-49%; n=15, 17%) or *low* (RRR 0-  
50  
51 24%; n=1, 1%). The estimated general risk of bleeding caused by OAC was  
52  
53 considered by patients as *intermediate* (HR for bleeding 1.25-1.49; n=37, 41%) and  
54  
55  
56  
57  
58  
59  
60

1  
2  
3 *low* (HR 1.00-1.24; n=30, 33%). Only 3 patients (3%) estimated the bleeding risk  
4  
5 associated with OAC as *very high* (HR > 2.00).  
6  
7

### 8 ***Follow up***

9  
10  
11 Follow up via telephone was obtained 18±2 months after enrolment from 84 patients  
12  
13 (92%). The remaining 7 patients were lost to follow up because of missing contact  
14  
15 details (n=6, 7%) or denial to participate (n=1, 1%). The following events were  
16  
17 reported during follow up: death of unknown cause (n=5, 5%), ischaemic stroke (n=2,  
18  
19 2%) and epistaxis requiring hospitalization (n=1, 1%). All patients with ischaemic or  
20  
21 bleeding events were under OAC therapy and had continued it until follow up.  
22  
23  
24

25  
26 At time of follow up, four patients had discontinued OAC therapy intermittently (n=1,  
27  
28 1%) or permanently (n=3, 3%). One female patient with CHA<sub>2</sub>DS<sub>2</sub>-VASc score of 2  
29  
30 reported that OAC therapy was terminated due to successful pulmonary vein isolation  
31  
32 without any recurrence of AF during 9 months of event recorder monitoring. Three  
33  
34 patients (CHA<sub>2</sub>DS<sub>2</sub>-VASc score between 3 and 7) discontinued OAC therapy on their  
35  
36 own; although one patient reinitiated OAC therapy after discussion with his general  
37  
38 practitioner.  
39  
40  
41

42  
43 Patients, who stopped OAC therapy on their own, believed that their current condition  
44  
45 “had no indication” for OAC therapy. Two of them had underestimated their individual  
46  
47 stroke risk at baseline interrogation, while one had overestimated it. Two stoppers  
48  
49 feared the risk of bleeding more than the risk for ischemic events.  
50  
51  
52  
53  
54  
55  
56  
57  
58  
59  
60

## Discussion

This cross-sectional questionnaire study in 91 OAC-naïve patients with non-valvular AF shows that (1) patients generally underestimated their risk of stroke, (2) they perceived their individual stroke risk to higher extent than bleeding risk and (3) there was a significant correlation between accuracy in answers and patients' judgement of their knowledge of AF. During follow up, we observed OAC discontinuation despite clear indication in 3% of patients.

Due to the high prevalence of AF in the western world, non-adherence to OAC in AF patients has a tremendous impact on our society. Despite the availability of adequate therapy, AF-related strokes are still estimated to cost eight billion USD annually in the United States<sup>29 30</sup> or over 9,000 GBP per stroke in the UK.<sup>31</sup> The increased severity of AF-related strokes compared to other etiologies<sup>32</sup> may even increase the negative effect of general embolic events on quality of life.<sup>33</sup> As a consequence, it is urgently necessary to ameliorate adherence to OAC therapy for AF. We proved underjudgement of stroke risk and therefore, postulate better patient education as a possibility to overcome this problem.

### ***No correlation between subjective assessment and objective risk***

To our knowledge, this is the first study that compares the subjective risk perception of AF patients with evidence-based risk scores used in daily clinical practice. We found no significant correlation between subjective and objective assessment of stroke or bleeding risk. Therefore, our study provides evidence that a perception gap remains after informed consent discussion before OAC initiation. Although not powered for it, we provide preliminary data on the OAC discontinuation rate one year



1  
2  
3 after OAC initiation. Two of three patients, who stopped OAC on their own, had  
4  
5 underestimated their stroke risk at baseline.  
6  
7

8  
9 If this finding remains constant in larger trials, it has a direct impact on clinical  
10  
11 practice. A perception gap between subjective and objective assessment of stroke or  
12  
13 bleeding risk is considered a major obstacle at the start of a lifelong medical  
14  
15 intervention. It hinders not only shared decision making, but may also worsen  
16  
17 treatment compliance and adherence.<sup>34</sup>  
18  
19

20  
21 Previous studies already evaluated the levels of information in patients after initiation  
22  
23 of OAC treatment.<sup>19 35-39</sup> In a survey of 711 AF patients that were on OAC for at least  
24  
25 one year, only 7% knew the purpose of anticoagulation in AF.<sup>38</sup> Lane et al.<sup>35</sup>  
26  
27 observed that 51% of AF patients with OAC therapy for  $\geq 3$  months could not name  
28  
29 their cardiac condition. Furthermore, the knowledge could not be increased by a brief  
30  
31 educational intervention. McCabe et al.<sup>40</sup> showed considerable knowledge deficits  
32  
33 already two weeks after initial diagnosis of AF. A recent qualitative systematic review  
34  
35 postulated the lack of patient information as one of the most important reasons for  
36  
37 VKA underuse.<sup>41</sup>  
38  
39

40  
41 Although Dantas et al.<sup>37</sup> demonstrated that only minimal knowledge of patients is  
42  
43 needed to allow acceptance of OAC, doctors should seek shared decisions. This is  
44  
45 even more important, when evidence for drug treatment is marginal,<sup>42</sup> which is  
46  
47 definitely not the case in patients with high risk scores for AF.<sup>2</sup> However, the  
48  
49 physician's perspective of shared decision making may not be congruent to the  
50  
51 patient's perceptions.<sup>43</sup> LaHaye et al.<sup>44</sup> demonstrated high interpatient variability  
52  
53 regarding individual treatment thresholds. Consequently, we propose that health  
54  
55 literacy of patients should be enhanced before OAC initiation, especially regarding  
56  
57 the individual risk/benefit ratio. Thus, patients may be able to participate in decision-  
58  
59  
60

1  
2  
3 making of therapy initiation. Patients also seem to have difficulties regarding verbal  
4 descriptions of risk.<sup>45</sup> Therefore, graphical information might help overcome this  
5  
6 problem.<sup>7 14</sup> One promising example is an electronic prototype for the translation of  
7  
8 Grading of Recommendations Assessment, Development and Evaluation (GRADE)  
9  
10 summaries<sup>46</sup> into decision aids using interactive formats to present evidence  
11  
12 summaries at varying levels of detail.<sup>16</sup> Another possibility is the establishment of a  
13  
14 Fact Box, which describes evidence of benefits and harms without making  
15  
16 recommendations.<sup>15</sup> Further theory-driven educational interventions have been  
17  
18 shown to increase OAC control<sup>47</sup> or knowledge of INR targets.<sup>35</sup>  
19  
20  
21  
22  
23

### 24 ***Stroke risk is topping bleeding risk***

25  
26  
27 In our study, most of the patients assumed their personal stroke risk to be the most  
28  
29 frequent and serious complication of untreated atrial fibrillation in their setting.  
30  
31 However, the majority (57%) underestimated their stroke risk while 41% interpreted  
32  
33 their bleeding risk accurately. In other studies, patients were keen on avoiding stroke  
34  
35 more than bleeding<sup>48</sup> and placed even more importance on stroke prevention than  
36  
37 doctors<sup>49</sup> with higher tolerance of adverse bleeding events.<sup>50</sup> Nevertheless, with  
38  
39 increased duration of OAC therapy, knowledge about OAC in the indication of AF  
40  
41 seems to deteriorate.<sup>38</sup>  
42  
43  
44  
45

### 46 ***Factors influencing correct risk estimation***

47  
48  
49 We found out that the highest level of educational attainment did not correlate with  
50  
51 analogies in risk estimation in our analysis. Our results therefore indicate that  
52  
53 understanding of individuals' risk is not correlated with formal education levels.  
54  
55 However, the preservation of knowledge might be correlated with better education.<sup>40</sup>  
56  
57  
58  
59  
60

1  
2  
3 Lip et al.<sup>39</sup> showed differences of AF perceptions in different ethnical groups. We  
4  
5 could not add evidence to this factor as we included only Caucasian patients.  
6  
7

8 Patients that felt better informed had an improved understanding of their individual  
9  
10 risks in this study. Consequently, we encourage to evaluate patients' information  
11  
12 level repeatedly by asking how informed they felt and to take appropriate measures  
13  
14 to enhance the patient's level of information if required.  
15  
16

### 17 **Limitations**

18  
19  
20 Our study has several limitations. Firstly, due to the absence of a screening log,  
21  
22 consecutive patient enrolment cannot be guaranteed. Secondly, the study was  
23  
24 powered for cross sectional analysis, but not for associations association between  
25  
26 baseline parameters and OAC adherence or events at follow up. Therefore, we can  
27  
28 only speculate that higher levels of information might be associated with better  
29  
30 adherence and outcomes as results of previous studies suggested. Thirdly, we did  
31  
32 not evaluate other bleeding risk scores, such as ATRIA<sup>51</sup> or ORBIT,<sup>52</sup> into the  
33  
34 analysis. Lastly, we intended to concentrate on the risk perception of individual  
35  
36 patients and did not evaluate the general knowledge of AF and stroke prevention per  
37  
38 se in a standardized questionnaire.<sup>53</sup> Due to this fact, we kept the questionnaire short  
39  
40 and tried to minimize bias due to selection of motivated patients that may not be  
41  
42 representative of the general AF population.<sup>19</sup>  
43  
44  
45  
46  
47  
48

### 49 **Conclusion**

50  
51  
52 In this cross-sectional analysis of OAC-naïve AF patients, we found major differences  
53  
54 between patients' perceptions and physicians' assessments of risks and benefits of  
55  
56  
57  
58  
59  
60

1  
2  
3 OAC. To ensure shared decision-making and informed consent, more attention  
4  
5 should be given to evidence-based and useful communication strategies.  
6  
7  
8  
9  
10  
11  
12  
13  
14  
15  
16  
17  
18  
19  
20  
21  
22  
23  
24  
25  
26  
27  
28  
29  
30  
31  
32  
33  
34  
35  
36  
37  
38  
39  
40  
41  
42  
43  
44  
45  
46  
47  
48  
49  
50  
51  
52  
53  
54  
55  
56  
57  
58  
59  
60

For peer review only

## Acknowledgements

We appreciate the helpful assistance of Mr. Stefan Zweiker in the preparation of the manuscript. This research received no specific grant from any funding agency in the public, commercial or not-for-profit sectors.

## Competing interests statement

Dr. Bauer reports personal fees from Bayer, Medtronic, Daiichi-Sankyo, Servier, personal fees from Bayer, AstraZeneca, other from Boehringer-Ingelheim, Bayer, Lilly outside the submitted work.

Dr. Heine has nothing to disclose.

Dr. Krippel has nothing to disclose.

Dr. Reicht has nothing to disclose.

Dr. Schumacher has nothing to disclose.

Dr. Sprenger has nothing to disclose.

Dr. Stepan has nothing to disclose.

Dr. Watzinger reports personal fees from Lectures, personal fees from Consulting, outside the submitted work.

Ms. Winkler has nothing to disclose.

Dr. Zweiker D has nothing to disclose.

Dr. Zweiker G has nothing to disclose.

1  
2  
3 Dr. Zweiker R reports grants from Lilly, personal fees from Boehringer Ingelheim,  
4 personal fees from Bayer, personal fees from Daiichi-Sankyo, outside the submitted  
5 work.  
6  
7  
8  
9

## 10 **Contributorship statement**

11  
12  
13  
14 RZ, MS and NW designed the study.

15  
16 RZ, EW, KR, MS, VS, PK, NB, MH, GR, GZ, MS and NW were involved in  
17  
18  
19  
20  
21  
22  
23  
24  
25  
26  
27  
28  
29  
30  
31  
32  
33  
34  
35  
36  
37  
38  
39  
40  
41  
42  
43  
44  
45  
46  
47  
48  
49  
50  
51  
52  
53  
54  
55  
56  
57  
58  
59  
60  
conduction of the study and data collection.

DZ and NW performed the statistical analysis.

DZ, RZ, MS and NW wrote the manuscript.

All authors have read and approved the last version of the manuscript.

## 30 **Data sharing statement**

31  
32  
33  
34  
35  
36  
37  
38  
39  
40  
41  
42  
43  
44  
45  
46  
47  
48  
49  
50  
51  
52  
53  
54  
55  
56  
57  
58  
59  
60  
All raw data is available in the supplementary appendix.

## Tables

|                                                             |          |
|-------------------------------------------------------------|----------|
| <b>CHADS<sub>2</sub> score</b>                              | 2 (1-3)  |
| <b>CHA<sub>2</sub>DS<sub>2</sub>-VASc score</b>             | 4 (2-5)  |
| CHA <sub>2</sub> DS <sub>2</sub> -VASc score $\geq$ 2       | 81 (89%) |
| <b>Congestive heart failure</b>                             | 14 (15%) |
| <b>Hypertension (diagnosis of arterial hypertension)</b>    | 75 (82%) |
| <b>Age &gt; 75 years</b>                                    | 48 (53%) |
| <b>Diabetes mellitus</b>                                    | 18 (20%) |
| <b>Stroke or TIA</b>                                        | 15 (17%) |
| <b>Vascular disease</b>                                     | 27 (30%) |
| <b>Age 65-75 years</b>                                      | 25 (28%) |
| <b>Female Sex</b>                                           | 41 (45%) |
| <b>HAS-BLED score</b>                                       | 2 (1-2)  |
| HAS-BLED score $\geq$ 3                                     | 17 (19%) |
| <b>Hypertension (systolic blood pressure &gt; 160 mmHg)</b> | 42 (46%) |
| <b>Abnormal kidney / liver function</b>                     | 8 (9%)   |
| <b>Stroke</b>                                               | 14 (15%) |

|                              |          |
|------------------------------|----------|
| Bleeding                     | 1 (1%)   |
| Labile INR values            | 1 (1%)   |
| Elderly (age > 65 years)     | 72 (79%) |
| Drugs or alcohol (1 point)   | 16 (18%) |
| Drugs and alcohol (2 points) | 2 (2%)   |

**Table 1.** CHA<sub>2</sub>DS<sub>2</sub>-VASc and HAS-BLED Scores and individual risk factors. TIA: transient ischaemic attack; INR: international normalized ratio.



## References

1. Camm AJ, Kirchhof P, Lip GY, et al. Guidelines for the management of atrial fibrillation: the Task Force for the Management of Atrial Fibrillation of the European Society of Cardiology (ESC). *Eur Heart J* 2010;31(19):2369-429. doi: 10.1093/eurheartj/ehq278
2. Kirchhof P, Benussi S, Kotecha D, et al. 2016 ESC Guidelines for the management of atrial fibrillation developed in collaboration with EACTS: The Task Force for the management of atrial fibrillation of the European Society of Cardiology (ESC) Developed with the special contribution of the European Heart Rhythm Association (EHRA) of the ESC Endorsed by the European Stroke Organisation (ESO). *Eur Heart J* 2016;37(38):2893-962. doi: 10.1093/eurheartj/ehw210 [published Online First: 2016/08/28]
3. Go AS, Hylek EM, Phillips KA, et al. Prevalence of diagnosed atrial fibrillation in adults: national implications for rhythm management and stroke prevention: the AnTicoagulation and Risk Factors in Atrial Fibrillation (ATRIA) Study. *Jama* 2001;285(18):2370-5. [published Online First: 2001/05/10]
4. Coulter A, Ellins J. Effectiveness of strategies for informing, educating, and involving patients. *BMJ* 2007;335(7609):24-7. doi: 10.1136/bmj.39246.581169.80
5. Spatz ES, Krumholz HM, Moulton BW. The New Era of Informed Consent: Getting to a Reasonable-Patient Standard Through Shared Decision Making. *Jama* 2016;315(19):2063-4. doi: 10.1001/jama.2016.3070 [published Online First: 2016/04/22]
6. Deyo RA. A key medical decision maker: the patient. *BMJ* 2001;323(7311):466-7.
7. Lane DA, Barker RV, Lip GY. Best practice for atrial fibrillation patient education. *Curr Pharm Des* 2015;21(5):533-43.
8. Health literacy: report of the Council on Scientific Affairs. Ad Hoc Committee on Health Literacy for the Council on Scientific Affairs, American Medical Association. *Jama* 1999;281(6):552-7. [published Online First: 1999/02/18]
9. Wilke T, Bauer S, Mueller S, et al. Patient Preferences for Oral Anticoagulation Therapy in Atrial Fibrillation: A Systematic Literature Review. *Patient* 2016 doi: 10.1007/s40271-016-0185-9 [published Online First: 2016/07/28]
10. Lip GY, Nieuwlaat R, Pisters R, et al. Refining clinical risk stratification for predicting stroke and thromboembolism in atrial fibrillation using a novel risk factor-based approach: the euro heart survey on atrial fibrillation. *Chest* 2010;137(2):263-72. doi: 10.1378/chest.09-1584
11. Pisters R, Lane DA, Nieuwlaat R, et al. A novel user-friendly score (HAS-BLED) to assess 1-year risk of major bleeding in patients with atrial fibrillation: the Euro Heart Survey. *Chest* 2010;138(5):1093-100. doi: 10.1378/chest.10-0134

- 1  
2  
3 12. January CT, Wann LS, Alpert JS, et al. 2014 AHA/ACC/HRS guideline for the  
4 management of patients with atrial fibrillation: a report of the American College  
5 of Cardiology/American Heart Association Task Force on Practice Guidelines  
6 and the Heart Rhythm Society. *J Am Coll Cardiol* 2014;64(21):e1-76. doi:  
7 10.1016/j.jacc.2014.03.022  
8
- 9  
10 13. Potpara TS, Pison L, Larsen TB, et al. How are patients with atrial fibrillation  
11 approached and informed about their risk profile and available therapies in  
12 Europe? Results of the European Heart Rhythm Association Survey.  
13 *Europace* 2015;17(3):468-72. doi: 10.1093/europace/euv025 [published  
14 Online First: 2015/02/28]  
15
- 16 14. Man-Son-Hing M, Laupacis A, O'Connor AM, et al. A patient decision aid  
17 regarding antithrombotic therapy for stroke prevention in atrial fibrillation: a  
18 randomized controlled trial. *JAMA* 1999;282(8):737-43.  
19
- 20 15. McDowell M, Rebitschek FG, Gigerenzer G, et al. A Simple Tool for  
21 Communicating the Benefits and Harms of Health Interventions: A Guide for  
22 Creating a Fact Box. *MDM Policy & Practice* 2016;1(1):1-10. doi:  
23 10.1177/2381468316665365  
24
- 25 16. Agoritsas T, Heen AF, Brandt L, et al. Decision aids that really promote shared  
26 decision making: the pace quickens. *BMJ* 2015;350:g7624. doi:  
27 10.1136/bmj.g7624  
28
- 29  
30 17. van der Pol M, Hennessy D, Manns B. The role of time and risk preferences in  
31 adherence to physician advice on health behavior change. *The European*  
32 *journal of health economics : HEPAC : health economics in prevention and*  
33 *care* 2016 doi: 10.1007/s10198-016-0800-7 [published Online First:  
34 2016/04/18]  
35
- 36 18. Yao X, Abraham NS, Alexander GC, et al. Effect of Adherence to Oral  
37 Anticoagulants on Risk of Stroke and Major Bleeding Among Patients With  
38 Atrial Fibrillation. *J Am Heart Assoc* 2016;5(2) doi: 10.1161/jaha.115.003074  
39 [published Online First: 2016/02/26]  
40
- 41 19. Aliot E, Breithardt G, Brugada J, et al. An international survey of physician and  
42 patient understanding, perception, and attitudes to atrial fibrillation and its  
43 contribution to cardiovascular disease morbidity and mortality. *Europace*  
44 2010;12(5):626-33. doi: 10.1093/europace/euq109  
45
- 46 20. Zhao S, Zhao H, Wang X, et al. Factors influencing medication knowledge and  
47 beliefs on warfarin adherence among patients with atrial fibrillation in China.  
48 *Patient preference and adherence* 2017;11:213-20. doi: 10.2147/ppa.s120962  
49 [published Online First: 2017/02/23]  
50
- 51 21. Lloyd AJ. The extent of patients' understanding of the risk of treatments. *Qual*  
52 *Health Care* 2001;10 Suppl 1:i14-8.  
53
- 54 22. LaHaye SA, Gibbens SL, Ball DG, et al. A clinical decision aid for the selection of  
55 antithrombotic therapy for the prevention of stroke due to atrial fibrillation. *Eur*  
56 *Heart J* 2012;33(17):2163-71. doi: 10.1093/eurheartj/ehs167  
57  
58  
59  
60

- 1  
2  
3 23. Olesen JB, Lip GY, Hansen PR, et al. Bleeding risk in 'real world' patients with  
4 atrial fibrillation: comparison of two established bleeding prediction schemes in  
5 a nationwide cohort. *J Thromb Haemost* 2011;9(8):1460-7. doi:  
6 10.1111/j.1538-7836.2011.04378.x  
7
- 8 24. Hart RG, Pearce LA, Aguilar MI. Meta-analysis: antithrombotic therapy to prevent  
9 stroke in patients who have nonvalvular atrial fibrillation. *Ann Intern Med*  
10 2007;146(12):857-67.  
11
- 12 25. Atrial Fibrillation Investigators. Risk factors for stroke and efficacy of  
13 antithrombotic therapy in atrial fibrillation. Analysis of pooled data from five  
14 randomized controlled trials. *Arch Intern Med* 1994;154(13):1449-57.  
15
- 16 26. Schulman S, Beyth RJ, Kearon C, et al. Hemorrhagic complications of  
17 anticoagulant and thrombolytic treatment: American College of Chest  
18 Physicians Evidence-Based Clinical Practice Guidelines (8th Edition). *Chest*  
19 2008;133(6 Suppl):257S-98S. doi: 10.1378/chest.08-0674  
20
- 21 27. You JJ, Singer DE, Howard PA, et al. Antithrombotic therapy for atrial fibrillation:  
22 Antithrombotic Therapy and Prevention of Thrombosis, 9th ed: American  
23 College of Chest Physicians Evidence-Based Clinical Practice Guidelines.  
24 *Chest* 2012;141(2 Suppl):e531S-75S. doi: 10.1378/chest.11-2304  
25
- 26 28. Mukaka M. A guide to appropriate use of Correlation coefficient in medical  
27 research. *Malawi Medical Journal : The Journal of Medical Association of*  
28 *Malawi* 2012;24(3):69-71.  
29
- 30 29. Caro JJ. An economic model of stroke in atrial fibrillation: the cost of suboptimal  
31 oral anticoagulation. *The American journal of managed care* 2004;10(14  
32 Suppl):S451-58; discussion S58-61. [published Online First: 2005/02/09]  
33
- 34 30. Casciano JP, Dotiwala ZJ, Martin BC, et al. The costs of warfarin underuse and  
35 nonadherence in patients with atrial fibrillation: a commercial insurer  
36 perspective. *Journal of managed care pharmacy : JMCP* 2013;19(4):302-16.  
37 doi: 10.18553/jmcp.2013.19.4.302 [published Online First: 2013/05/01]  
38
- 39 31. Ali AN, Howe J, Abdel-Hafiz A. Cost of acute stroke care for patients with atrial  
40 fibrillation compared with those in sinus rhythm. *PharmacoEconomics*  
41 2015;33(5):511-20. doi: 10.1007/s40273-015-0263-1 [published Online First:  
42 2015/02/20]  
43
- 44 32. Lang C, Seyfang L, Ferrari J, et al. Do Women With Atrial Fibrillation Experience  
45 More Severe Strokes? Results From the Austrian Stroke Unit Registry. *Stroke*  
46 2017 doi: 10.1161/strokeaha.116.015900 [published Online First: 2017/02/06]  
47
- 48 33. King RB. Quality of life after stroke. *Stroke* 1996;27(9):1467-72. [published Online  
49 First: 1996/09/01]  
50
- 51 34. Berkman ND, Sheridan SL, Donahue KE, et al. Low health literacy and health  
52 outcomes: an updated systematic review. *Ann Intern Med* 2011;155(2):97-107.  
53 doi: 10.7326/0003-4819-155-2-201107190-00005  
54
- 55  
56  
57  
58  
59  
60

- 1  
2  
3 35. Lane DA, Ponsford J, Shelley A, et al. Patient knowledge and perceptions of  
4 atrial fibrillation and anticoagulant therapy: effects of an educational  
5 intervention programme. The West Birmingham Atrial Fibrillation Project. *Int J*  
6 *Cardiol* 2006;110(3):354-8. doi: 10.1016/j.ijcard.2005.07.031  
7
- 8 36. Arnsten JH, Gelfand JM, Singer DE. Determinants of compliance with  
9 anticoagulation: A case-control study. *Am J Med* 1997;103(1):11-7.  
10
- 11 37. Dantas GC, Thompson BV, Manson JA, et al. Patients' perspectives on taking  
12 warfarin: qualitative study in family practice. *BMC Fam Pract* 2004;5:15. doi:  
13 10.1186/1471-2296-5-15  
14
- 15 38. Lip GY, Agnelli G, Thach AA, et al. Oral anticoagulation in atrial fibrillation: A pan-  
16 European patient survey. *Eur J Intern Med* 2007;18(3):202-8. doi:  
17 10.1016/j.ejim.2006.11.005  
18
- 19 39. Lip GY, Kamath S, Jafri M, et al. Ethnic differences in patient perceptions of atrial  
20 fibrillation and anticoagulation therapy: the West Birmingham Atrial Fibrillation  
21 Project. *Stroke* 2002;33(1):238-42.  
22
- 23 40. McCabe PJ, Schad S, Hampton A, et al. Knowledge and self-management  
24 behaviors of patients with recently detected atrial fibrillation. *Heart Lung*  
25 2008;37(2):79-90. doi: 10.1016/j.hrtlng.2007.02.006  
26
- 27 41. Mas Dalmau G, Sant Arderiu E, Enfedaque Montes MB, et al. Patients' and  
28 physicians' perceptions and attitudes about oral anticoagulation and atrial  
29 fibrillation: a qualitative systematic review. *BMC Fam Pract* 2017;18(1):3. doi:  
30 10.1186/s12875-016-0574-0 [published Online First: 2017/01/15]  
31
- 32 42. Charles C, Whelan T, Gafni A. What do we mean by partnership in making  
33 decisions about treatment? *BMJ* 1999;319(7212):780-2.  
34
- 35 43. Borg Xuereb C, Shaw RL, Lane DA. Patients' and health professionals' views and  
36 experiences of atrial fibrillation and oral-anticoagulant therapy: a qualitative  
37 meta-synthesis. *Patient Educ Couns* 2012;88(2):330-7. doi:  
38 10.1016/j.pec.2012.05.011 [published Online First: 2012/06/29]  
39
- 40 44. LaHaye S, Regpala S, Lacombe S, et al. Evaluation of patients' attitudes towards  
41 stroke prevention and bleeding risk in atrial fibrillation. *Thromb Haemost*  
42 2014;111(3):465-73. doi: 10.1160/TH13-05-0424  
43
- 44 45. Fuller R, Dudley N, Blacktop J. Risk communication and older people-  
45 understanding of probability and risk information by medical inpatients aged 75  
46 years and older. *Age Ageing* 2001;30(6):473-6. [published Online First:  
47 2001/12/18]  
48
- 49 46. Vandvik PO, Brandt L, Alonso-Coello P, et al. Creating clinical practice guidelines  
50 we can trust, use, and share: a new era is imminent. *Chest* 2013;144(2):381-9.  
51 doi: 10.1378/chest.13-0746  
52
- 53 47. Clarkesmith DE, Pattison HM, Lip GY, et al. Educational intervention improves  
54 anticoagulation control in atrial fibrillation patients: the TREAT randomised  
55 trial. *PLoS One* 2013;8(9):e74037. doi: 10.1371/journal.pone.0074037  
56  
57  
58  
59  
60

- 1  
2  
3 48. MacLean S, Mulla S, Akl EA, et al. Patient values and preferences in decision  
4 making for antithrombotic therapy: a systematic review: Antithrombotic  
5 Therapy and Prevention of Thrombosis, 9th ed: American College of Chest  
6 Physicians Evidence-Based Clinical Practice Guidelines. *Chest* 2012;141(2  
7 Suppl):e1S-23S. doi: 10.1378/chest.11-2290  
8
- 9  
10 49. Devereaux PJ, Anderson DR, Gardner MJ, et al. Differences between  
11 perspectives of physicians and patients on anticoagulation in patients with  
12 atrial fibrillation: observational study. *BMJ* 2001;323(7323):1218-22.  
13
- 14 50. Alonso-Coello P, Montori VM, Diaz MG, et al. Values and preferences for oral  
15 antithrombotic therapy in patients with atrial fibrillation: physician and patient  
16 perspectives. *Health Expect* 2014;18:2318-27. doi: 10.1111/hex.12201  
17
- 18 51. Fang MC, Go AS, Chang Y, et al. A new risk scheme to predict warfarin-  
19 associated hemorrhage: The ATRIA (Anticoagulation and Risk Factors in Atrial  
20 Fibrillation) Study. *J Am Coll Cardiol* 2011;58(4):395-401. doi:  
21 10.1016/j.jacc.2011.03.031 [published Online First: 2011/07/16]  
22
- 23 52. O'Brien EC, Simon DN, Thomas LE, et al. The ORBIT bleeding score: a simple  
24 bedside score to assess bleeding risk in atrial fibrillation. *Eur Heart J*  
25 2015;36(46):3258-64. doi: 10.1093/eurheartj/ehv476 [published Online First:  
26 2015/10/02]  
27
- 28  
29 53. Hendriks JM, Crijns HJ, Tieleman RG, et al. The atrial fibrillation knowledge  
30 scale: development, validation and results. *Int J Cardiol* 2013;168(2):1422-8.  
31 doi: 10.1016/j.ijcard.2012.12.047  
32  
33  
34  
35  
36  
37  
38  
39  
40  
41  
42  
43  
44  
45  
46  
47  
48  
49  
50  
51  
52  
53  
54  
55  
56  
57  
58  
59  
60

## Figure legends

Figure 1: CHA<sub>2</sub>DS<sub>2</sub>-VASc and HAS-BLED scores of individual patients, including our classification into low, intermediate, high and very high stroke risk groups (stratified by CHA<sub>2</sub>DS<sub>2</sub>-VASc score).

Figure 2: Correlation of CHA<sub>2</sub>DS<sub>2</sub>-VASc score and subjective assessed stroke risk.

Figure 3: Correlation of HAS-BLED score and subjective assessed bleeding risk.

Figure 4: Amount of correct answered assessment of stroke risk in patients with different self-assessed levels of information.

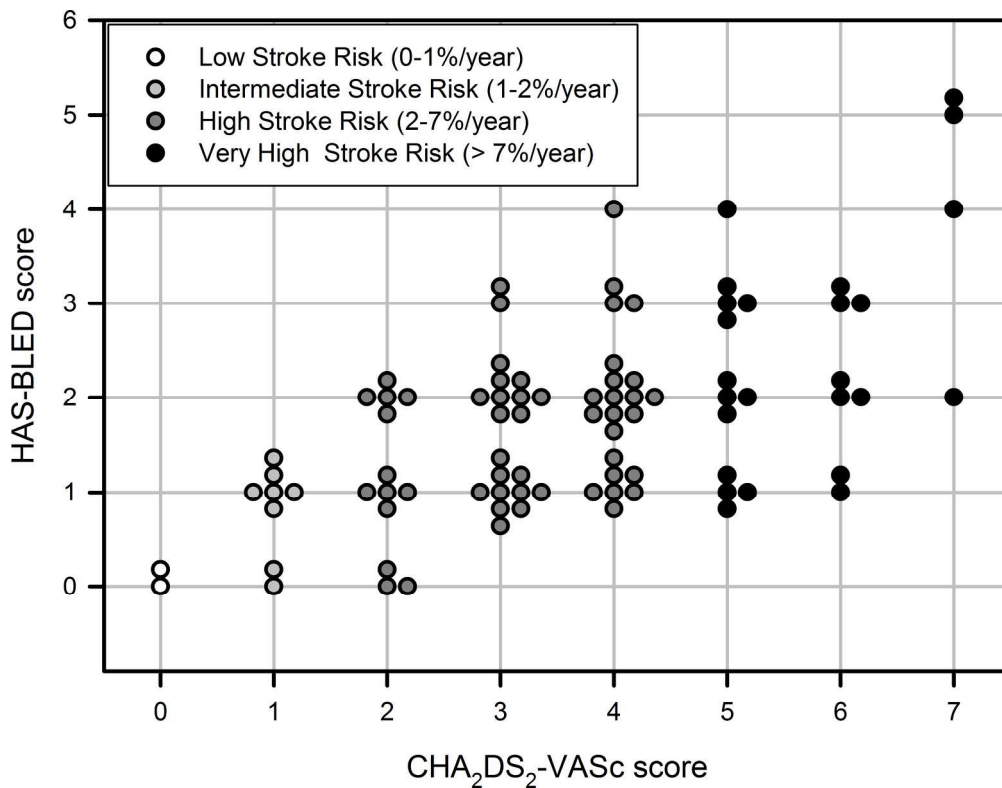

Figure 1: CHA<sub>2</sub>DS<sub>2</sub>-VASc and HAS-BLED scores of individual patients, including our classification into low, intermediate, high and very high stroke risk groups (stratified by CHA<sub>2</sub>DS<sub>2</sub>-VASc score).

107x83mm (600 x 600 DPI)

For peer review only

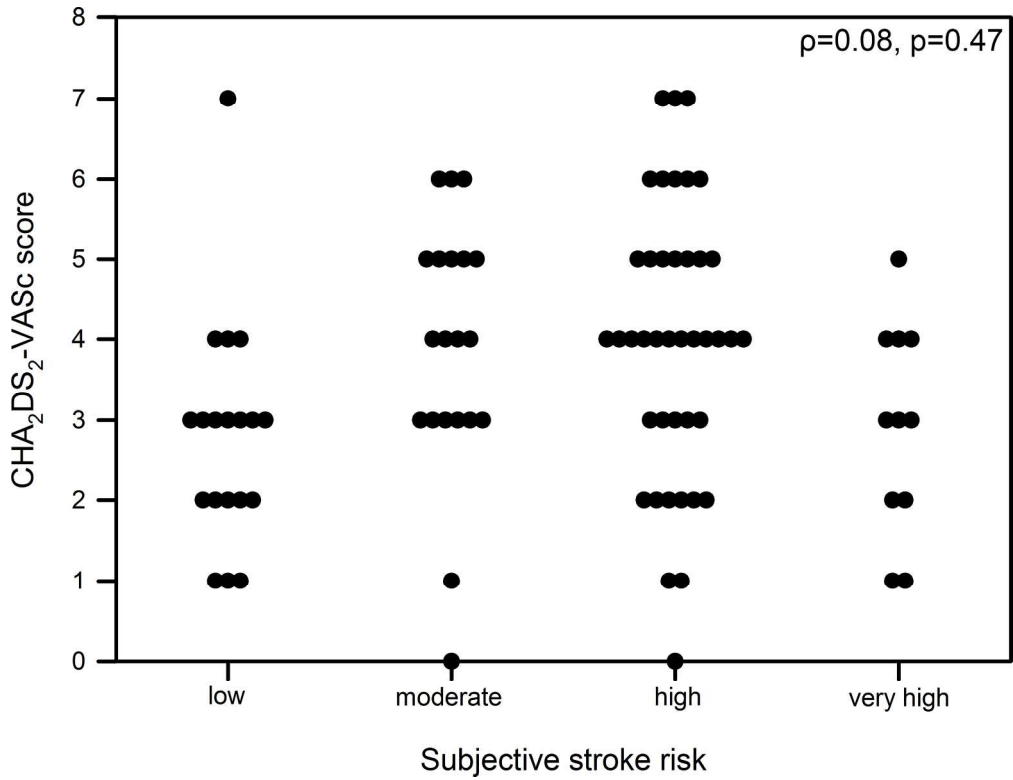

Figure 2: Correlation of CHA<sub>2</sub>DS<sub>2</sub>-VASc score and subjective assessed stroke risk.

107x82mm (600 x 600 DPI)

Peer Review Only

1  
2  
3  
4  
5  
6  
7  
8  
9  
10  
11  
12  
13  
14  
15  
16  
17  
18  
19  
20  
21  
22  
23  
24  
25  
26  
27  
28  
29  
30  
31  
32  
33  
34  
35  
36  
37  
38  
39  
40  
41  
42  
43  
44  
45  
46  
47  
48  
49  
50  
51  
52  
53  
54  
55  
56  
57  
58  
59  
60



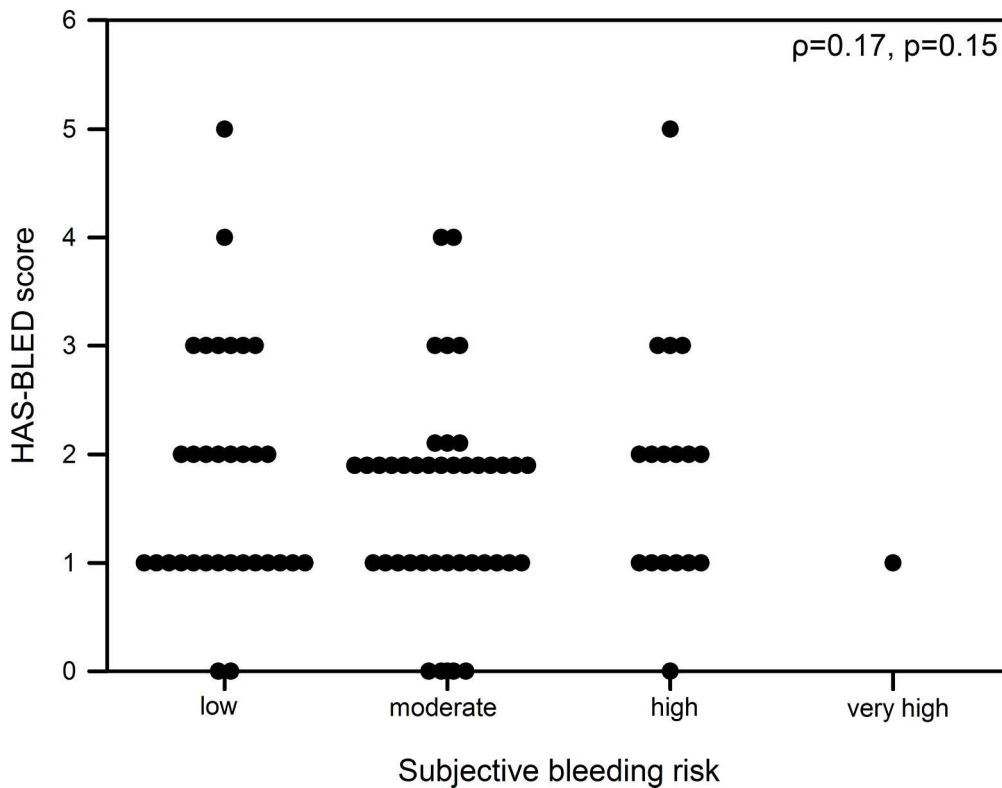

Figure 3: Correlation of HAS-BLED score and subjective assessed bleeding risk.

107x83mm (600 x 600 DPI)

Peer Review Only

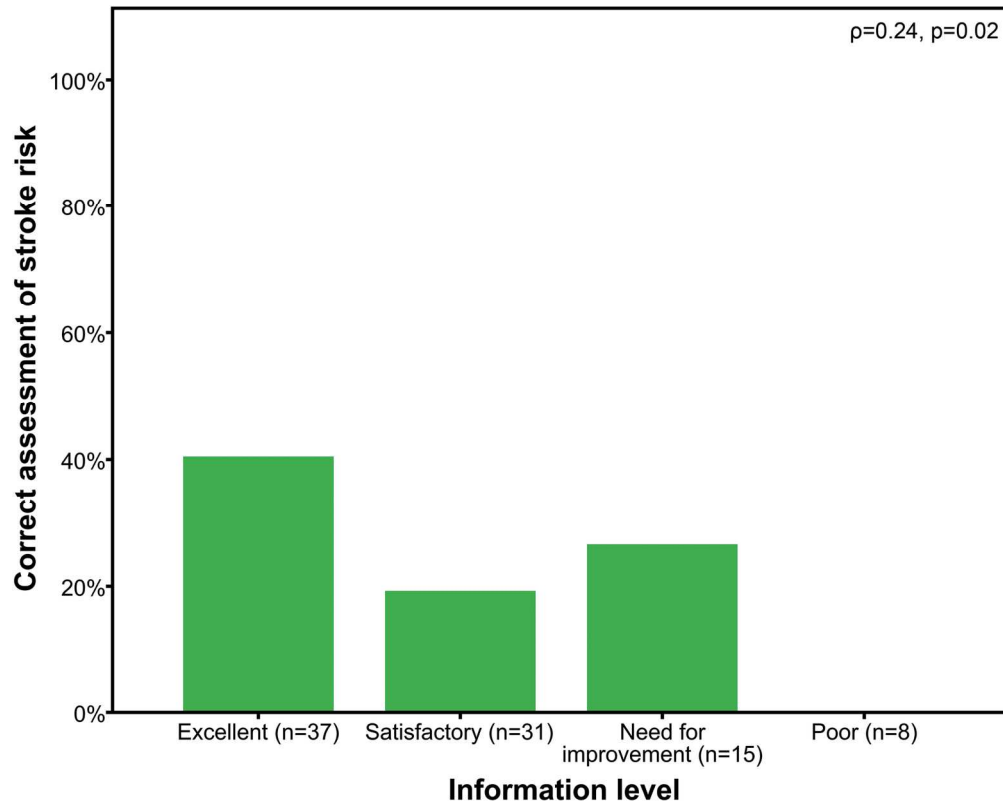

Figure 4: Amount of correct answered assessment of stroke risk in patients with different self-assessed levels of information.

162x129mm (300 x 300 DPI)

1  
2  
3  
4  
5  
6  
7  
8  
9  
10  
11  
12  
13  
14  
15  
16  
17  
18  
19  
20  
21  
22  
23  
24  
25  
26  
27  
28  
29  
30  
31  
32  
33  
34  
35  
36  
37  
38  
39  
40  
41  
42  
43  
44  
45  
46  
47  
48  
49  
50  
51  
52  
53  
54  
55  
56  
57  
58  
59  
60

# Association between subjective risk perception and objective risk estimation in atrial fibrillation patients: a cross-sectional study.

David Zweiker<sup>1</sup>, Robert Zweiker<sup>1</sup>, Elisabeth Winkler<sup>1</sup>, Konstantina Roesch<sup>1</sup>, Martin Schumacher<sup>2</sup>, Vinzenz Stepan<sup>3</sup>, Peter Krippel<sup>4</sup>, Norbert Bauer<sup>5</sup>, Martin Heine<sup>6</sup>, Gerhard Reicht<sup>7</sup>, Gudrun Zweiker<sup>8</sup>, Martin Sprenger<sup>9</sup>, Norbert Watzinger<sup>10\*</sup>

<sup>1</sup> Division of Cardiology, Department of Internal Medicine, Medical University of Graz, Graz, Austria

<sup>2</sup> Department of Internal Medicine, Hospital Barmherzige Brueder Marschallgasse, Graz, Austria

<sup>3</sup> Department of Internal Medicine, Hospital Elisabethinen, Graz, Austria

<sup>4</sup> Department of Internal Medicine, LKH Fürstenfeld, Krankenhausverbund Feldbach-Fürstenfeld, Fürstenfeld, Austria

<sup>5</sup> Department of Internal Medicine, LKH Hartberg, Hartberg, Austria

<sup>6</sup> Department of Neurology, LKH Feldbach, Krankenhausverbund Feldbach-Fürstenfeld, Feldbach, Austria

<sup>7</sup> Department of Internal Medicine, Hospital Barmherzige Brueder Eggenberg, Graz, Austria

<sup>8</sup> General Practitioner, Straden, Austria

<sup>9</sup> Department of Social Medicine and Epidemiology, Medical University of Graz, Graz, Austria

<sup>10</sup> Department of Internal Medicine, LKH Feldbach, Krankenhausverbund Feldbach-Fürstenfeld, Feldbach, Austria

\* Corresponding author:

Norbert Watzinger, MD

Department of Internal Medicine, LKH Feldbach

Krankenhausverbund Feldbach-Fürstenfeld

Ottokar-Kernstock-Strasse 18

8330 Feldbach

Austria

email: [norbert.watzinger@lkh-feldbach.at](mailto:norbert.watzinger@lkh-feldbach.at)

phone: +43 3152 899 3201

fax: +43 3152 899 3209

## Supplemental material

**Supplemental tables****Part I: To be completed by the patient**

1) How do you judge the risk of stroke without anticoagulation?

- a) Low
- b) Intermediate
- c) High
- d) Very high

2) How do you judge the efficacy of the proposed therapy? How strong is the effect of anticoagulation to avoid a stroke?

- a) Low
- b) Intermediate
- c) High
- d) Very high

3) The bleeding risk depends on comorbidities. How do you judge the risk of severe haemorrhagic complications within one year?

- a) Low
- b) Intermediate
- c) High
- d) Very high

4) How do you judge the disadvantages of treatment? How do you think increases the risk of severe haemorrhage if you take your medication appropriately?

- a) Low
- b) Intermediate
- c) High
- d) Very high

1  
2  
3  
4  
5  
6  
7  
8  
9  
10  
11  
12  
13  
14  
15  
16  
17  
18  
19  
20  
21  
22  
23  
24  
25  
26  
27  
28  
29  
30  
31  
32  
33  
34  
35  
36  
37  
38  
39  
40  
41  
42  
43  
44  
45  
46  
47  
48  
49  
50  
51  
52  
53  
54  
55  
56  
57  
58  
59  
60

5) Would you discontinue anticoagulation therapy if minor bleedings would occur (e.g. haematoma, epistaxis, gum bleeding)

- a) Yes
- b) No
- c) I don't know

6) What do you fear more: stroke or bleeding complications?

- a) Stroke
- b) Bleeding
- c) I don't know

7) How do judge your general level of information regarding the disease "Atrial fibrillation" and the proposed therapy?

- a) Good
- b) Okay
- c) Improvable
- d) Bad

**Part II: To be completed by the physician**

1) Demographics

- a) Age (years):
- b) Gender: female/male
- c) Education: compulsory school/apprenticeship/vocational school/grammar school/vocational school with higher entrance qualification/university of applied sciences/university of general sciences

2) Planned type of anticoagulation

- a) Vitamin K antagonist (VKA)
- b) NOAC

- 1  
2  
3  
4  
5  
6  
7
- c) Low molecular weight heparin
  - d) Combination with antiplatelet

8  
9

### 3) CHA<sub>2</sub>DS<sub>2</sub>-VASc score

- 10  
11  
12  
13  
14  
15  
16  
17  
18  
19  
20  
21  
22  
23  
24  
25  
26  
27  
28
- a) C = Congestive heart failure / LV dysfunction
  - b) H = Hypertension
  - c) A<sub>2</sub> = Age ≥ 75 years
  - d) D = Diabetes mellitus
  - e) S<sub>2</sub> = Stroke/TIA/thrombo-embolism
  - f) V = Vascular disease
  - g) A = Age 65-74 years
  - h) S = Sex category (i.e. female sex)

29  
30

### 4) HAS-BLED Score

- 31  
32  
33  
34  
35  
36  
37  
38  
39  
40  
41  
42  
43  
44  
45  
46  
47  
48  
49  
50  
51  
52  
53  
54  
55  
56  
57  
58  
59  
60
- a) H = Uncontrolled hypertension (systolic blood pressure > 160 mmHg)
  - b) A = Abnormal renal function (presence of chronic dialysis or renal transplantation or serum creatinine ≥200 mmol/L) or abnormal liver function (chronic hepatic disease [e.g. cirrhosis] or biochemical evidence of significant hepatic derangement [e.g. bilirubin 2 x upper limit of normal, in association with aspartate aminotransferase/alanine aminotransferase/alkaline phosphatase .3 x upper limit normal]) (1 point each)
  - c) S = Stroke
  - d) B = Bleeding (previous bleeding history and/or predisposition to bleeding, e.g. bleeding diathesis, anaemia)
  - e) L = Labile INRs (unstable/high INRs or poor time in therapeutic range [e.g. < 60%])

f) D = Drugs or alcohol (concomitant use of drugs, such as antiplatelet agents, non-steroidal anti-inflammatory drugs, or alcohol abuse) (1 point each)

**Supplemental table S1.** Questionnaire (English translation). LV: left ventricle; TIA: transitory ischaemic attack; INR: international normalized range

|                                                          |          |
|----------------------------------------------------------|----------|
| <b>Patients per centre</b>                               |          |
| LKH Feldbach, Department of Internal Medicine            | 36 (40%) |
| Medical University of Graz, Division of Cardiology       | 18 (20%) |
| BHB Graz-Marschallgasse, Department of Internal Medicine | 9 (10%)  |
| KH Elisabethinen Graz, Department of Internal Medicine   | 8 (9%)   |
| LKH Feldbach, Department of Neurology                    | 6 (7%)   |
| LKH Fürstenfeld, Department of Internal Medicine         | 5 (6%)   |
| LKH Hartberg, Department of Internal Medicine            | 5 (6%)   |
| BHB Graz-Eggenberg, Department of Internal Medicine      | 2 (2%)   |
| Zweiker, MD, General Practitioner                        | 2 (2%)   |
| <b>Highest completed education (ISCED level)</b>         |          |
| Lower secondary education (2)                            | 32 (35%) |
| Upper secondary vocational education (3B)                | 25 (28%) |
| Upper secondary general education (3A)                   | 8 (9%)   |

|                                                       |        |
|-------------------------------------------------------|--------|
| Upper secondary vocational education (3C)             | 4 (4%) |
| Tertiary general education (5A)                       | 3 (3%) |
| Post-secondary non-tertiary vocational education (4A) | 2 (2%) |
| Tertiary vocational education (5A)                    | 1 (1%) |

**Supplemental table S2.** Demographics of included patients. ISCED: International Standard Classification of Education.



1  
2  
3  
4  
5  
6  
7  
8  
9  
10  
11  
12  
13  
14  
15  
16  
17  
18  
19  
20  
21  
22  
23  
24  
25  
26  
27  
28  
29  
30  
31  
32  
33  
34  
35  
36  
37  
38  
39  
40  
41  
42  
43  
44  
45  
46  
47  
48  
49  
50  
51  
52  
53  
54  
55  
56  
57  
58  
59  
60

## STROBE Statement—checklist of items that should be included in reports of observational studies

|                           | Item No | Recommendation                                                                                                                                                                                                                                                                                                                                                                                                                                                         | Information can be found in page |
|---------------------------|---------|------------------------------------------------------------------------------------------------------------------------------------------------------------------------------------------------------------------------------------------------------------------------------------------------------------------------------------------------------------------------------------------------------------------------------------------------------------------------|----------------------------------|
| <b>Title and abstract</b> | 1       | (a) Indicate the study's design with a commonly used term in the title or the abstract                                                                                                                                                                                                                                                                                                                                                                                 | Abstract                         |
|                           |         | (b) Provide in the abstract an informative and balanced summary of what was done and what was found                                                                                                                                                                                                                                                                                                                                                                    | Abstract                         |
| <b>Introduction</b>       |         |                                                                                                                                                                                                                                                                                                                                                                                                                                                                        |                                  |
| Background/rationale      | 2       | Explain the scientific background and rationale for the investigation being reported                                                                                                                                                                                                                                                                                                                                                                                   | 6-7                              |
| Objectives                | 3       | State specific objectives, including any prespecified hypotheses                                                                                                                                                                                                                                                                                                                                                                                                       | 7                                |
| <b>Methods</b>            |         |                                                                                                                                                                                                                                                                                                                                                                                                                                                                        |                                  |
| Study design              | 4       | Present key elements of study design early in the paper                                                                                                                                                                                                                                                                                                                                                                                                                | 8                                |
| Setting                   | 5       | Describe the setting, locations, and relevant dates, including periods of recruitment, exposure, follow-up, and data collection                                                                                                                                                                                                                                                                                                                                        | 8-10                             |
| Participants              | 6       | (a) <i>Cohort study</i> —Give the eligibility criteria, and the sources and methods of selection of participants. Describe methods of follow-up<br><i>Case-control study</i> —Give the eligibility criteria, and the sources and methods of case ascertainment and control selection. Give the rationale for the choice of cases and controls<br><i>Cross-sectional study</i> —Give the eligibility criteria, and the sources and methods of selection of participants | 8                                |
|                           |         | (b) <i>Cohort study</i> —For matched studies, give matching criteria and number of exposed and unexposed<br><i>Case-control study</i> —For matched studies, give matching criteria and the number of controls per case                                                                                                                                                                                                                                                 | Not applicable                   |
| Variables                 | 7       | Clearly define all outcomes, exposures, predictors, potential confounders, and effect modifiers. Give diagnostic criteria, if applicable                                                                                                                                                                                                                                                                                                                               | 8-10                             |
| Data sources/measurement  | 8*      | For each variable of interest, give sources of data and details of methods of assessment (measurement). Describe comparability of assessment methods if there is more than one group                                                                                                                                                                                                                                                                                   | 8-10                             |
| Bias                      | 9       | Describe any efforts to address potential sources of bias                                                                                                                                                                                                                                                                                                                                                                                                              | 17                               |
| Study size                | 10      | Explain how the study size was arrived at                                                                                                                                                                                                                                                                                                                                                                                                                              | 10                               |
| Quantitative variables    | 11      | Explain how quantitative variables were handled in the analyses. If applicable, describe which groupings were chosen and why                                                                                                                                                                                                                                                                                                                                           | 8                                |
| Statistical methods       | 12      | (a) Describe all statistical methods, including those used to control for confounding                                                                                                                                                                                                                                                                                                                                                                                  | 9                                |
|                           |         | (b) Describe any methods used to examine subgroups and interactions                                                                                                                                                                                                                                                                                                                                                                                                    | 10                               |
|                           |         | (c) Explain how missing data were addressed                                                                                                                                                                                                                                                                                                                                                                                                                            | 10                               |
|                           |         | (d) <i>Cohort study</i> —If applicable, explain how loss to follow-up                                                                                                                                                                                                                                                                                                                                                                                                  | 10                               |

was addressed

*Case-control study*—If applicable, explain how matching of cases and controls was addressed

*Cross-sectional study*—If applicable, describe analytical methods taking account of sampling strategy

(e) Describe any sensitivity analyses 10

## Results

|                          |     |                                                                                                                                                                                                              |                          |
|--------------------------|-----|--------------------------------------------------------------------------------------------------------------------------------------------------------------------------------------------------------------|--------------------------|
| Participants             | 13* | (a) Report numbers of individuals at each stage of study—eg numbers potentially eligible, examined for eligibility, confirmed eligible, included in the study, completing follow-up, and analysed            | 11                       |
|                          |     | (b) Give reasons for non-participation at each stage                                                                                                                                                         | 11                       |
|                          |     | (c) Consider use of a flow diagram                                                                                                                                                                           | Not applicable           |
| Descriptive data         | 14* | (a) Give characteristics of study participants (eg demographic, clinical, social) and information on exposures and potential confounders                                                                     | 10                       |
|                          |     | (b) Indicate number of participants with missing data for each variable of interest                                                                                                                          | 11-13                    |
|                          |     | (c) <i>Cohort study</i> —Summarise follow-up time (eg, average and total amount)                                                                                                                             | Not applicable           |
| Outcome data             | 15* | <i>Cohort study</i> —Report numbers of outcome events or summary measures over time                                                                                                                          | Not applicable           |
|                          |     | <i>Case-control study</i> —Report numbers in each exposure category, or summary measures of exposure                                                                                                         | Not applicable           |
|                          |     | <i>Cross-sectional study</i> —Report numbers of outcome events or summary measures                                                                                                                           | 11-13                    |
| Main results             | 16  | (a) Give unadjusted estimates and, if applicable, confounder-adjusted estimates and their precision (eg, 95% confidence interval). Make clear which confounders were adjusted for and why they were included | 11-13                    |
|                          |     | (b) Report category boundaries when continuous variables were categorized                                                                                                                                    | 11-13                    |
|                          |     | (c) If relevant, consider translating estimates of relative risk into absolute risk for a meaningful time period                                                                                             | Not relevant             |
| Other analyses           | 17  | Report other analyses done—eg analyses of subgroups and interactions, and sensitivity analyses                                                                                                               | Not applicable           |
| <b>Discussion</b>        |     |                                                                                                                                                                                                              |                          |
| Key results              | 18  | Summarise key results with reference to study objectives                                                                                                                                                     | 14-17                    |
| Limitations              | 19  | Discuss limitations of the study, taking into account sources of potential bias or imprecision. Discuss both direction and magnitude of any potential bias                                                   | 17                       |
| Interpretation           | 20  | Give a cautious overall interpretation of results considering objectives, limitations, multiplicity of analyses, results from similar studies, and other relevant evidence                                   | 14-17                    |
| Generalisability         | 21  | Discuss the generalisability (external validity) of the study results                                                                                                                                        | 14-17                    |
| <b>Other information</b> |     |                                                                                                                                                                                                              |                          |
| Funding                  | 22  | Give the source of funding and the role of the funders for the present study and, if applicable, for the original study on which the present article is based                                                | Transparency declaration |

1  
2  
3  
4  
5  
6  
7  
8  
9  
10  
11  
12  
13  
14  
15  
16  
17  
18  
19  
20  
21  
22  
23  
24  
25  
26  
27  
28  
29  
30  
31  
32  
33  
34  
35  
36  
37  
38  
39  
40  
41  
42  
43  
44  
45  
46  
47  
48  
49  
50  
51  
52  
53  
54  
55  
56  
57  
58  
59  
60

\*Give information separately for cases and controls in case-control studies and, if applicable, for exposed and unexposed groups in cohort and cross-sectional studies.

**Note:** An Explanation and Elaboration article discusses each checklist item and gives methodological background and published examples of transparent reporting. The STROBE checklist is best used in conjunction with this article (freely available on the Web sites of PLoS Medicine at <http://www.plosmedicine.org/>, Annals of Internal Medicine at <http://www.annals.org/>, and Epidemiology at <http://www.epidem.com/>). Information on the STROBE Initiative is available at [www.strobe-statement.org](http://www.strobe-statement.org).

For peer review only
