# Supplementary material for: Association between subjective risk perception and objective risk estimation in patients with atrial fibrillation: a cross-sectional study
Source: PubMed Central journal article supplement — BMJ Open. 2017 Sep 25;7(9):e018242. doi: 10.1136/bmjopen-2017-018242 (PMC5623506; doi:10.1136/bmjopen-2017-018242), 2017-09-25
Supplement: bmjopen-2017-018242supp001.pdf [file bmjopen-2017-018242supp001.pdf]

# **Association between subjective risk perception and objective risk estimation in atrial fibrillation patients: a cross-sectional study.**

David Zweiker<sup>1</sup>, Robert Zweiker<sup>1</sup>, Elisabeth Winkler<sup>1</sup>, Konstantina Roesch<sup>1</sup>, Martin Schumacher<sup>2</sup>, Vinzenz Stepan<sup>3</sup>, Peter Krippel<sup>4</sup>, Norbert Bauer<sup>5</sup>, Martin Heine<sup>6</sup>, Gerhard Reicht<sup>7</sup>, Gudrun Zweiker<sup>8</sup>, Martin Sprenger<sup>9</sup>, Norbert Watzinger<sup>10\*</sup>

<sup>1</sup> Division of Cardiology, Department of Internal Medicine, Medical University of Graz, Graz, Austria

<sup>2</sup> Department of Internal Medicine, Hospital Barmherzige Brueder Marschallgasse, Graz, Austria

<sup>3</sup> Department of Internal Medicine, Hospital Elisabethinen, Graz, Austria

<sup>4</sup> Department of Internal Medicine, LKH Fürstenfeld, Krankenhausverbund Feldbach-Fürstenfeld, Fürstenfeld, Austria

<sup>5</sup> Department of Internal Medicine, LKH Hartberg, Hartberg, Austria

<sup>6</sup> Department of Neurology, LKH Feldbach, Krankenhausverbund Feldbach-Fürstenfeld, Feldbach, Austria

<sup>7</sup> Department of Internal Medicine, Hospital Barmherzige Brueder Eggenberg, Graz, Austria

<sup>8</sup> General Practitioner, Straden, Austria

<sup>9</sup> Department of Social Medicine and Epidemiology, Medical University of Graz, Graz, Austria

<sup>10</sup> Department of Internal Medicine, LKH Feldbach, Krankenhausverbund Feldbach-Fürstenfeld, Feldbach, Austria

\* Corresponding author:

Norbert Watzinger, MD

Department of Internal Medicine, LKH Feldbach

Krankenhausverbund Feldbach-Fürstenfeld

Ottokar-Kernstock-Strasse 18

8330 Feldbach

Austria

email: [norbert.watzinger@lkh-feldbach.at](mailto:norbert.watzinger@lkh-feldbach.at)

phone: +43 3152 899 3201

fax: +43 3152 899 3209

## **Supplemental material**

## ***Supplemental tables***

### **Part I: To be completed by the patient**

1) How do you judge the risk of stroke without anticoagulation?

- a) Low
- b) Intermediate
- c) High
- d) Very high

2) How do you judge the efficacy of the proposed therapy? How strong is the effect of anticoagulation to avoid a stroke?

- a) Low
- b) Intermediate
- c) High
- d) Very high

3) The bleeding risk depends on comorbidities. How do you judge the risk of severe haemorrhagic complications within one year?

- a) Low
- b) Intermediate
- c) High
- d) Very high

4) How do you judge the disadvantages of treatment? How do you think increases the risk of severe haemorrhage if you take your medication appropriately?

- a) Low
- b) Intermediate
- c) High
- d) Very high

5) Would you discontinue anticoagulation therapy if minor bleedings would occur (e.g. haematoma, epistaxis, gum bleeding)

- a) Yes
- b) No
- c) I don't know

6) What do you fear more: stroke or bleeding complications?

- a) Stroke
- b) Bleeding
- c) I don't know

7) How do judge your general level of information regarding the disease "Atrial fibrillation" and the proposed therapy?

- a) Good
- b) Okay
- c) Improvable
- d) Bad

**Part II: To be completed by the physician**

1) Demographics

- a) Age (years):
- b) Gender: female/male
- c) Education: compulsory school/apprenticeship/vocational school/grammar school/vocational school with higher entrance qualification/university of applied sciences/university of general sciences

2) Planned type of anticoagulation

- a) Vitamin K antagonist (VKA)
- b) NOAC

- c) Low molecular weight heparin
- d) Combination with antiplatelet

3) CHA<sub>2</sub>DS<sub>2</sub>-VASc score

- a) C = Congestive heart failure / LV dysfunction
- b) H = Hypertension
- c) A<sub>2</sub> = Age ≥ 75 years
- d) D = Diabetes mellitus
- e) S<sub>2</sub> = Stroke/TIA/thrombo-embolism
- f) V = Vascular disease
- g) A = Age 65-74 years
- h) S = Sex category (i.e. female sex)

4) HAS-BLED Score

- a) H = Uncontrolled hypertension (systolic blood pressure > 160 mmHg)
- b) A = Abnormal renal function (presence of chronic dialysis or renal transplantation or serum creatinine ≥200 μmol/L) or abnormal liver function (chronic hepatic disease [e.g. cirrhosis] or biochemical evidence of significant hepatic derangement [e.g. bilirubin 2 x upper limit of normal, in association with aspartate aminotransferase/alanine aminotransferase/alkaline phosphatase .3 x upper limit normal]) (1 point each)
- c) S = Stroke
- d) B = Bleeding (previous bleeding history and/or predisposition to bleeding, e.g. bleeding diathesis, anaemia)
- e) L = Labile INRs (unstable/high INRs or poor time in therapeutic range [e.g. < 60%])

f) D = Drugs or alcohol (concomitant use of drugs, such as antiplatelet agents, non-steroidal anti-inflammatory drugs, or alcohol abuse) (1 point each)

**Supplemental table S1.** Questionnaire (English translation). LV: left ventricle; TIA: transitory ischaemic attack; INR: international normalized range

|                                                          |          |
|----------------------------------------------------------|----------|
| <b>Patients per centre</b>                               |          |
| LKH Feldbach, Department of Internal Medicine            | 36 (40%) |
| Medical University of Graz, Division of Cardiology       | 18 (20%) |
| BHB Graz-Marschallgasse, Department of Internal Medicine | 9 (10%)  |
| KH Elisabethinen Graz, Department of Internal Medicine   | 8 (9%)   |
| LKH Feldbach, Department of Neurology                    | 6 (7%)   |
| LKH Fürstenfeld, Department of Internal Medicine         | 5 (6%)   |
| LKH Hartberg, Department of Internal Medicine            | 5 (6%)   |
| BHB Graz-Eggenberg, Department of Internal Medicine      | 2 (2%)   |
| Zweiker, MD, General Practitioner                        | 2 (2%)   |
| <b>Highest completed education (ISCED level)</b>         |          |
| Lower secondary education (2)                            | 32 (35%) |
| Upper secondary vocational education (3B)                | 25 (28%) |
| Upper secondary general education (3A)                   | 8 (9%)   |

|                                                       |        |
|-------------------------------------------------------|--------|
| Upper secondary vocational education (3C)             | 4 (4%) |
| Tertiary general education (5A)                       | 3 (3%) |
| Post-secondary non-tertiary vocational education (4A) | 2 (2%) |
| Tertiary vocational education (5A)                    | 1 (1%) |

**Supplemental table S2.** Demographics of included patients. ISCED: International Standard Classification of Education.
